# Supplementary material for: Tungsten oxides: green and sustainable heterogeneous nanocatalysts for the synthesis of bioactive heterocyclic compounds
Source: Royal Society of Chemistry journal article supplement (doi:10.1039/d0dt04238b), 2021-01-01
Supplement: d0dt04238b1.pdf [file d0dt04238b1.pdf]

## Supporting Information

### **Tungsten Oxide: Green and Sustainable Heterogeneous Nanocatalyst for Synthesis of Bioactive Heterocyclic Compounds**

*T. A. J. Siddiqui<sup>a</sup>, Shoyebmohamad F. Shaikh<sup>b\*</sup>, Balaji B. Totawar<sup>c</sup>, Madhuri Dumpala<sup>d</sup>,  
Mohd Ubaidullah<sup>b</sup>, Badr M. Thamer<sup>b</sup>, Rajaram S. Mane<sup>a\*</sup>, and Abdullah M. Al-Enizi<sup>b</sup>*

*<sup>a</sup>School of Physical Sciences, Swami Ramanand Teerth Marathwada University, Nanded-  
431606, M.S., India*

*<sup>b</sup>Department of Chemistry, College of Science, King Saud University, Riyadh 11451, Saudi  
Arabia*

*<sup>c</sup>Department of Chemistry, SMT. G. G. Khadse College, Muktainagar, Jalgaon, 425306,  
India*

*<sup>d</sup>Department of Physics, Osmania University College for Women, Koti, Hyderabad, 50095,  
India.*

\*Corresponding Authors: Shoyebmohamad F. Shaikh ([sshaikh1@ksu.edu.sa](mailto:sshaikh1@ksu.edu.sa)) and Rajaram S. Mane ([rajarammane70@srtmun.ac.in](mailto:rajarammane70@srtmun.ac.in))

#### ***General procedure for the WO<sub>3</sub> catalysed reaction for C-3 Alkylation of 4 hydroxycoumarin***

In a dry round bottom flask WO<sub>3</sub> (10 mol%), secondary benzyl alcohol (1mmol), 4-hydroxycoumarin (1mmol) were mixed and the reaction mixture was stirred at 100°C for specified time (see **Table 2**). The progress of the reaction was monitored by TLC. After the completion of reaction, the reaction mixture was dissolved in ethanol and boiled. The undissolved WO<sub>3</sub> catalyst was separated by simple filtration method. The filtrate was cooled down to 0-5 °C to precipitate the desired product which was separated again by simple filtration

method. The obtained product was washed 2-3 times by ethanol to afford corresponding pure product.

***General procedure for the heterogeneous WO<sub>3</sub> catalysed multicomponent reaction for synthesis of chromenes***

In a dry round bottom flask, WO<sub>3</sub> (10 mol%), Dimedone (1mmol), aromatic aldehyde (1mmol) and malanonitrile (1mmol) were mixed and stirred at 70°C for specified time (Table 3). The progress of the reaction was monitored by TLC. After the completion of reaction, the reaction mixture was dissolved in ethanol and boiled. The undissolved WO<sub>3</sub> catalyst was separated by simple filtration method. The filtrate was cooled down to 0-5°C to precipitate the desired product which was separated again by simple filtration method. The obtained product was washed 2-3 times by ethanol to afford corresponding pure product.

**General procedure for the heterogeneous WO<sub>3</sub> catalysed reaction for synthesis of xanthene**

In a dry round bottom flask, WO<sub>3</sub> (10 mol%), Dimedone (1mmol), aromatic aldehyde (1mmol) were mixed and stirred at 70°C, for specified time (Table 4). The progress of the reaction was monitored by TLC. After the completion of reaction, the reaction mixture was dissolved in ethanol and boiled. The undissolved WO<sub>3</sub> catalyst was separated by simple filtration method. The filtrate was cooled down to 0-5°C to precipitate the desired product which was separated again by simple filtration method. The obtained product was washed 2-3 times by ethanol to afford corresponding pure chromene derivatives.

**Table S1:** Comparative catalysts activity study of WO<sub>3</sub> NRs with commercially available WO<sub>3</sub> for C-3 Alkylation of 4-hydroxycoumarin derivative 3a.

| Sr. No. | Catalyst (10 mol%)          | Solvent      | Temp. (°C)    | Time (min) | Yield <sup>b</sup> (%) |
|---------|-----------------------------|--------------|---------------|------------|------------------------|
| 1       | Commercial WO <sub>3</sub>  | Solvent free | Heat (100 °C) | 60         | 94                     |
| 2       | WO <sub>3</sub> NPs         | Solvent free | Heat (100 °C) | 70         | 92                     |
| 3       | WO <sub>3</sub> Nanospheres | Solvent free | Heat (100 °C) | 75         | 93                     |
| 4       | WO <sub>3</sub> Nanorods    | Solvent free | Heat (100 °C) | 60         | 95                     |

<sup>a</sup>Reaction conditions: 4-hydroxycoumarin (100 mg), Secondary benzyl Alcohol (1 equivalent), different forms of WO<sub>3</sub> (10 mol%), with continuous stirring under thermal condition, solvent free, <sup>b</sup>Isolation yield.

**Table S2:** Assessment of reported catalysts catalytic activity with WO<sub>3</sub> NRs for C-3 Alkylation of 4-hydroxycoumarin.

| Sr. no. | Cat (mol.%)                                               | Solvent                  | Temp (°C) | Time (h) | Yield <sup>b</sup> (%) | ref |
|---------|-----------------------------------------------------------|--------------------------|-----------|----------|------------------------|-----|
| 1       | Bi(OTf) <sub>3</sub> (1)                                  | MeNO <sub>2</sub>        | 90        | 4        | 85                     | 1   |
| 2       | BiCl <sub>3</sub> (1)                                     | MeNO <sub>2</sub>        | 90        | 7        | 30                     | 1   |
| 3       | BiBr <sub>3</sub> (1)                                     | MeNO <sub>2</sub>        | 90        | 7        | 10                     | 1   |
| 4       | TfOH (3)                                                  | MeNO <sub>2</sub>        | 90        | 4        | 70                     | 1   |
| 5       | I <sub>2</sub> (20)                                       | MeNO <sub>2</sub>        | 50        | 3        | 75                     | 2   |
| 6       | Bi(NO <sub>3</sub> ) <sub>3</sub> .5H <sub>2</sub> O (10) | [BMIM][PF <sub>6</sub> ] | 30        | 1        | 90                     | 3   |
| 7       | Amberlite IR 120 (50 mg)                                  | CH <sub>3</sub> CN       | Reflux    | 1.5      | 73                     | 4   |
| 8       | A-TiO <sub>2</sub> (20 mg)                                | Solvent free             | 70        | 5        | 95                     | 5   |
| 9       | SO <sub>4</sub> <sup>-</sup> /SnO <sub>2</sub> (10 mg)    | CH <sub>3</sub> COOH     | Reflux    | 5        | 75                     | 6   |

|    |                            |              |     |   |    |           |
|----|----------------------------|--------------|-----|---|----|-----------|
| 10 | WO <sub>3</sub> (10 mol %) | Solvent free | 100 | 1 | 95 | This work |
|----|----------------------------|--------------|-----|---|----|-----------|

<sup>a</sup>Reaction conditions: 4-hydroxycoumarin (100 mg), Secondary benzyl Alcohol (1 equivalent), different catalysts, with continuous stirring under thermal condition, solvent free, <sup>b</sup>Isolation yield.

**Table S3:** Assessment of reported catalysts other than WO<sub>3</sub> NRs for the synthesis of chromenes.

| Entry | Catalyst                        | Catalyst loading | Solvent               | Temp. (°C) | Time (Min) | Yield <sup>b</sup> (%) | Ref. |
|-------|---------------------------------|------------------|-----------------------|------------|------------|------------------------|------|
| 1     | No catalyst                     | -                | EtOH:H <sub>2</sub> O | Reflux     | --         | --                     | --   |
| 2     | ZnO NPs                         | 10 mol%          | EtOH                  | Reflux     | 20         | 83                     | 7    |
| 3     | Urea                            | 10 mol%          | EtOH:H <sub>2</sub> O | Reflux     | 480        | 85                     | 8    |
| 4     | Na <sub>2</sub> CO <sub>3</sub> | 10 mol%          | EtOH:H <sub>2</sub> O | 120        | 100        | 95                     | 9    |
| 5     | Aq PEG-400                      | 1ml              | EtOH:H <sub>2</sub> O | Reflux     | 180        | 85                     | 10   |
| 6     | Cerium (III)chloride            | 10 mol%          | EtOH:H <sub>2</sub> O | Reflux     | 80         | 83                     | 11   |
| 7     | Piperidine                      |                  | H <sub>2</sub> O      | Reflux     | 380        | 75                     | 12   |
| 8     | S-Proline                       | 10 mol%          | EtOH:H <sub>2</sub> O | Reflux     | 180        | 80                     | 13   |
| 9     | CuO NPs                         | 15 mol%          | H <sub>2</sub> O      | 100        | 420        | 90                     | 14   |
| 10    | DBSA                            |                  | H <sub>2</sub> O      |            | 280        | 92                     | 15   |
| 11    | TBAF                            | 10 mol%          | H <sub>2</sub> O      | Reflux     | 55         | 93                     | 16   |
| 12    | I <sub>2</sub>                  | 10 mol%          | DMSO                  | 120        | 250        | 82                     | 17   |
| 13    | DMAP                            |                  | EtOH                  | --         | 180        | 75                     | 18   |
| 14    | Lactose                         |                  | EtOH:H <sub>2</sub> O | --         | 30         | 65                     | 19   |
| 15    | CaHPO <sub>4</sub>              | 10 mol%          | EtOH:H <sub>2</sub> O | 80         | 150        | 88                     | 20   |
| 16    | TBAB                            | 10 mol%          | H <sub>2</sub> O      | reflux     | 100        | 85                     | 21   |

|    |                     |          |                       |        |     |    |              |
|----|---------------------|----------|-----------------------|--------|-----|----|--------------|
| 17 | POPINO              | 7.5 mol% | H <sub>2</sub> O      | reflux | 70  | 90 | 22           |
| 18 | Starch<br>solution  | 4ml      | No solvent            | 50     | 80  | 95 | 23           |
| 19 | AP-SiO <sub>2</sub> |          | H <sub>2</sub> O      | 70     | 150 | 89 | 24           |
| 20 | WO <sub>3</sub>     | 10 mol%  | EtOH:H <sub>2</sub> O | reflux | --  | 97 | This<br>work |
| 21 | WO <sub>3</sub>     | 10 mol%  | Solvent free          | 70     | --  | 97 | This<br>work |

<sup>a</sup>Reaction conditions: Dimedone (100 mg), benzaldehyde (1 equivalent), malononitrile (1 equivalent), WO<sub>3</sub> NRs, different catalysts with continuous stirring at 70°C, <sup>b</sup>Isolation yield.

**Table S4:** Assessment of reported catalysts in addition to WO<sub>3</sub> NRs for the synthesis of xanthenes.

| Sr.<br>no. | Catalyst                                                           | Solvent                    | Temp.<br>(°C) | Time<br>(h) | Yield <sup>b</sup><br>(%) | Ref. |
|------------|--------------------------------------------------------------------|----------------------------|---------------|-------------|---------------------------|------|
| 1          | InCl <sub>3</sub>                                                  | [bmim]BF <sub>4</sub>      | 80            | 5           | 93                        | 25   |
| 2          | PANI-PTSA                                                          | H <sub>2</sub> O           | Reflux        | 6           | 70                        | 26   |
| 3          | Amberlyst-15                                                       | CH <sub>3</sub> CN         | Reflux        | 5           | 90                        | 27   |
| 4          | DABCO-Bromine                                                      | H <sub>2</sub> O           | Reflux        | 2           | 90                        | 28   |
| 5          | ZnO NPs (10 mg)                                                    | Solvent free               | 80            | 1/2         | 90                        | 29   |
| 6          | CuO NPs (10 mg)                                                    | Solvent free               | 80            | 1/2         | 92                        | 30   |
| 7          | SmCl <sub>3</sub> (20 mol%)                                        | Solvent free               | 120           | 8           | 95                        | 31   |
| 8          | Fe <sub>3</sub> O <sub>4</sub> @SiO <sub>2</sub> -Imid-PMA (30 mg) | EtOH                       | Reflux        | 1           | 92                        | 32   |
| 9          | I <sub>2</sub>                                                     | Solvent free               | 90            | 2.5         | 91                        | 33   |
| 10         | CAN (5 mol%)                                                       | 2-Propanol<br>(ultrasound) | 50            | 1/2         | 96                        | 34   |

|    |                             |                       |     |     |    |                  |
|----|-----------------------------|-----------------------|-----|-----|----|------------------|
| 11 | CaCl <sub>2</sub> (20 mol%) | DMSO                  | 90  | 4   | 83 | 35               |
| 12 | Cu(II)-Fur-APTES/GO (20 mg) | H <sub>2</sub> O:EtOH | 50  | 1/2 | 96 | 36               |
| 13 | Boric acid (0.5 mol%)       | Solvent free          | 120 | 1/2 | 97 | 37               |
| 14 | WO <sub>3</sub>             | Solvent free          | 70  | 1/2 | 97 | This<br>wor<br>k |

---

<sup>a</sup>Reaction conditions: benzaldehyde (1 equivalent), Dimedone (2 equivalent) WO<sub>3</sub> NRs (10 mol%), H<sub>2</sub>O/EtOH solvent system with continuous stirring at 70°C, <sup>b</sup>Isolation yield.

### ***Plausible reaction mechanism for the formation of chromenes derivatives***

It considers the aldehyde–catalyst surface interaction. A plausible first step for the reaction cascade is the thermal energy induced activation of the carbonyl carbon of aromatic aldehyde followed by reaction with Malanonitrile *via* Knoevenagel condensation to form intermediate **I**. After losing water, **I** give intermediate **II**. The enol form of dimedone undergoes Michael addition with intermediate **II** to produce intermediate **III**. Finally, product **V** is formed by intramolecular cyclization of **III** and tautomerization of **IV** (**Scheme S1**).

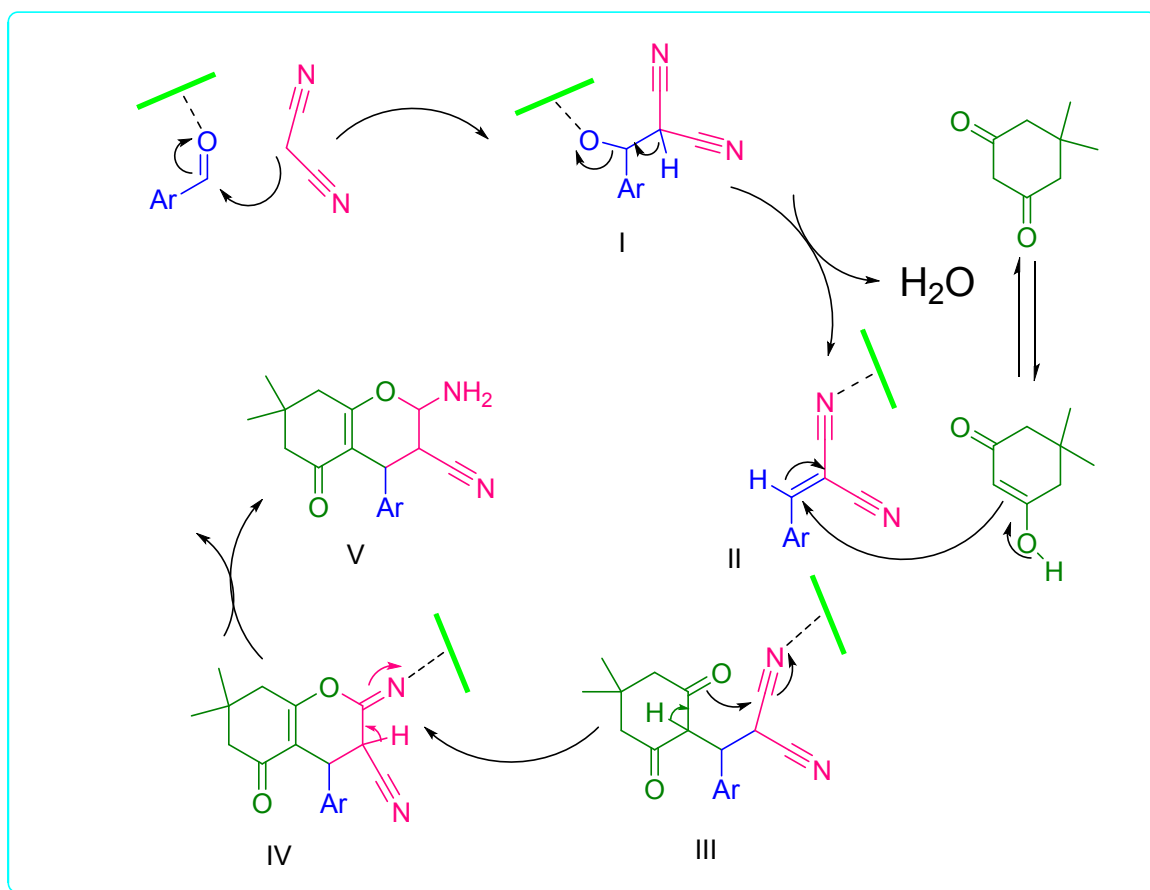

**Scheme S1:** Plausible reaction mechanism for the formation of chromenes derivatives.

***A plausible reaction pathway for the formation of xanthenes derivatives***

WO<sub>3</sub>NRs catalysed plausible reaction pathway for the formation of xanthenes **Scheme S2** and considers the aldehyde surface interaction which is believed to be responsible for the absorption of visible light. The first step of the cascade reaction is the light-induced activation of carbonyl carbon of aromatic aldehyde with enol form of dione forming the intermediate **I**, this intermediate after losing water gives intermediate **II**. Enol form of second molecule of dione undergoes Michael addition with intermediate **II** to form intermediate **III**. Finally, the product **V** was formed by intramolecular cyclization of **III** with subsequent removal of water from **IV**.

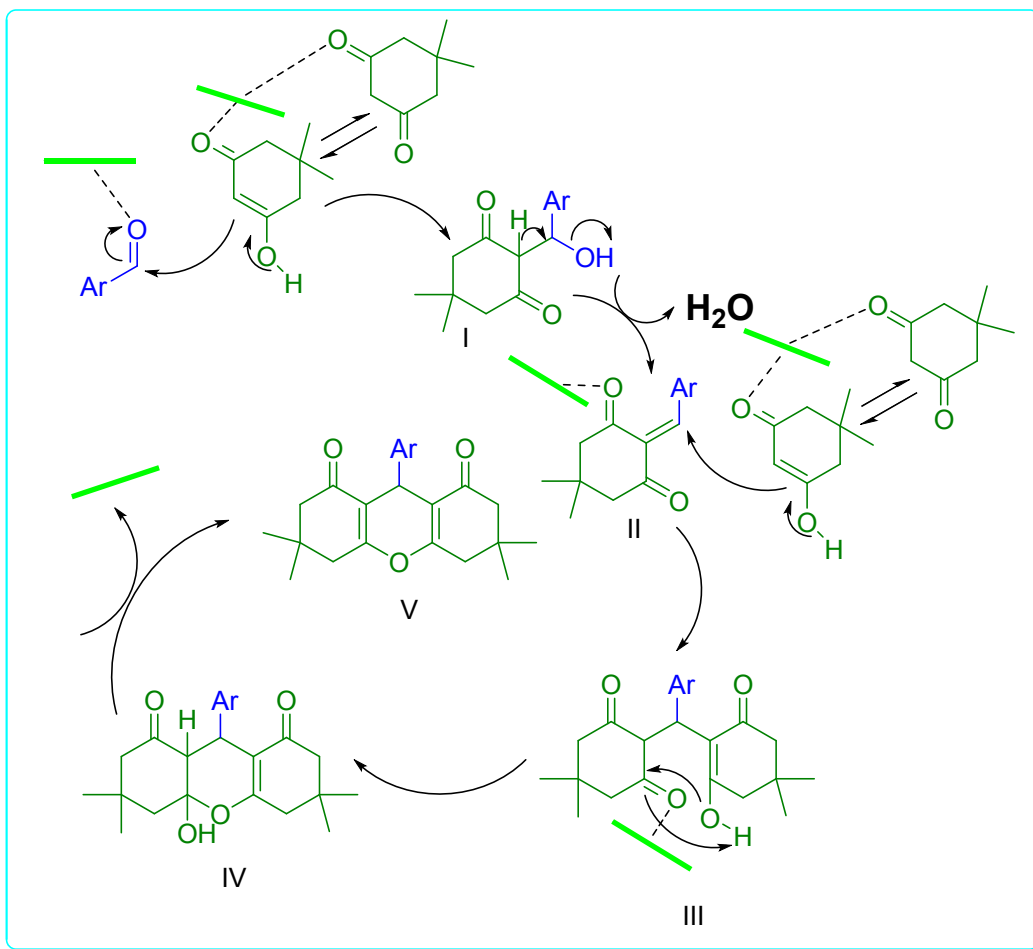

**Scheme S2:** Reaction mechanism for the formation of Xanthenes derivatives.



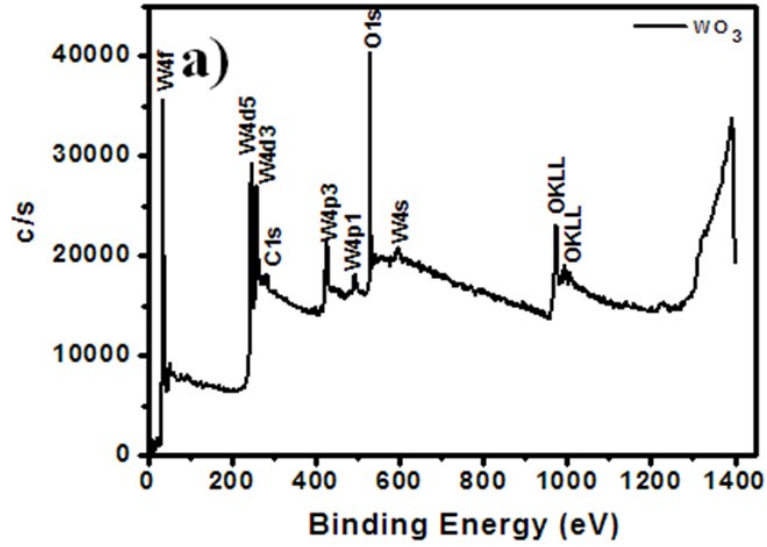

**Fig. S1:** XPS survey spectrum of WO<sub>3</sub> NRs.

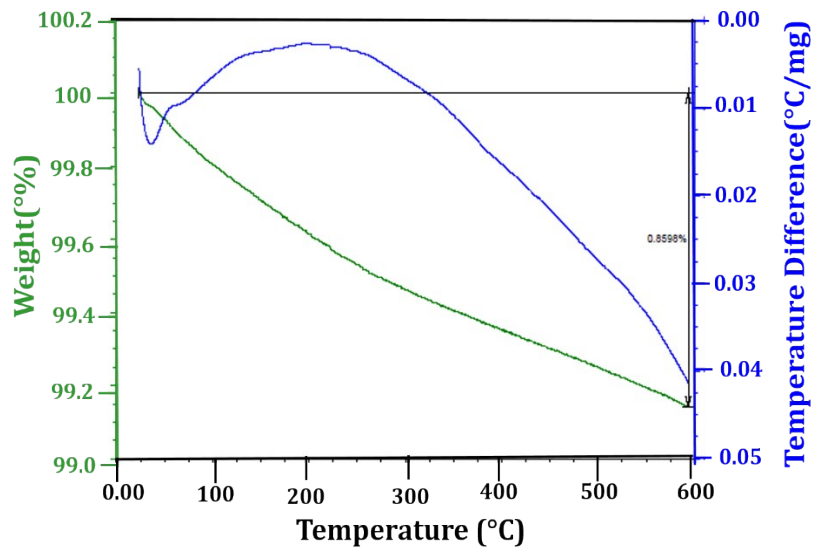

**Fig. S2** Thermal analysis (TGA/DTA) of WO<sub>3</sub> NRs

The TGA/DTA plot confirms that the ammonium paratungstate decomposes through loss of water molecules and the formation of WO<sub>3</sub> could affirm at around 500°C. Based on this information an annealing temperature to produced WO<sub>3</sub> NRs was 500°C.<sup>38</sup>

### <sup>1</sup>H-NMR of 4-hydroxy-3-(1-phenylethyl)-2H-chromen-2-one (3a)

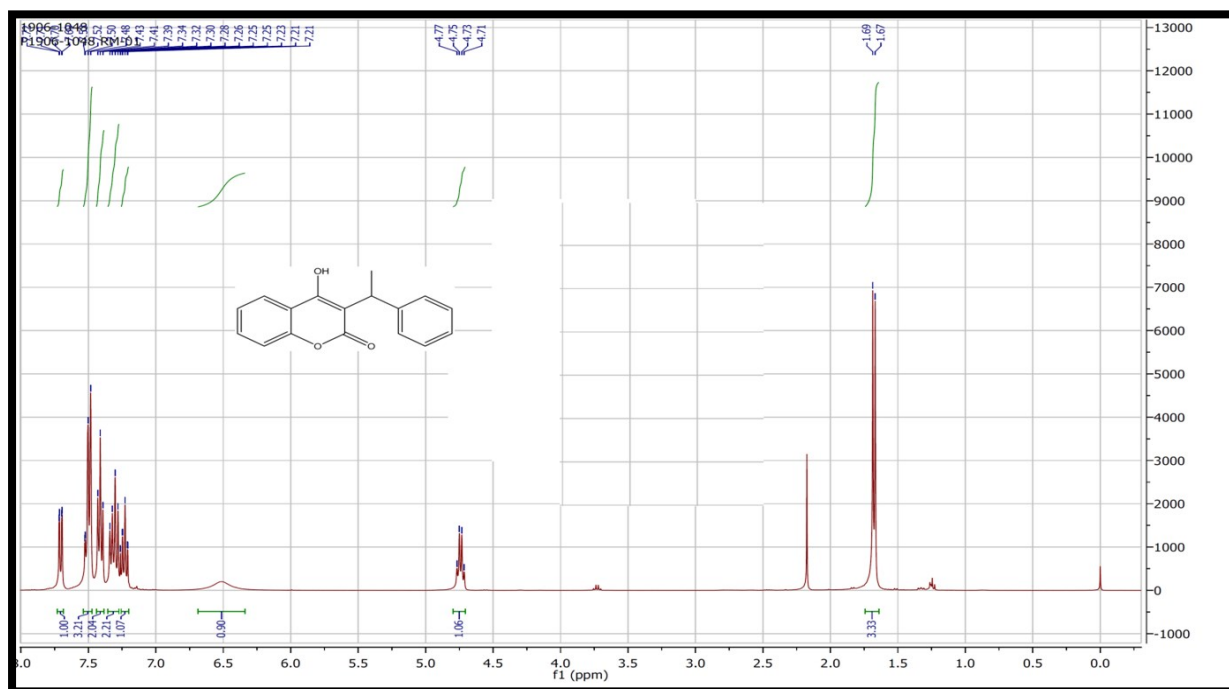

### <sup>13</sup>C-NMR of 4-hydroxy-3-(1-phenylethyl)-2H-chromen-2-one (3a)

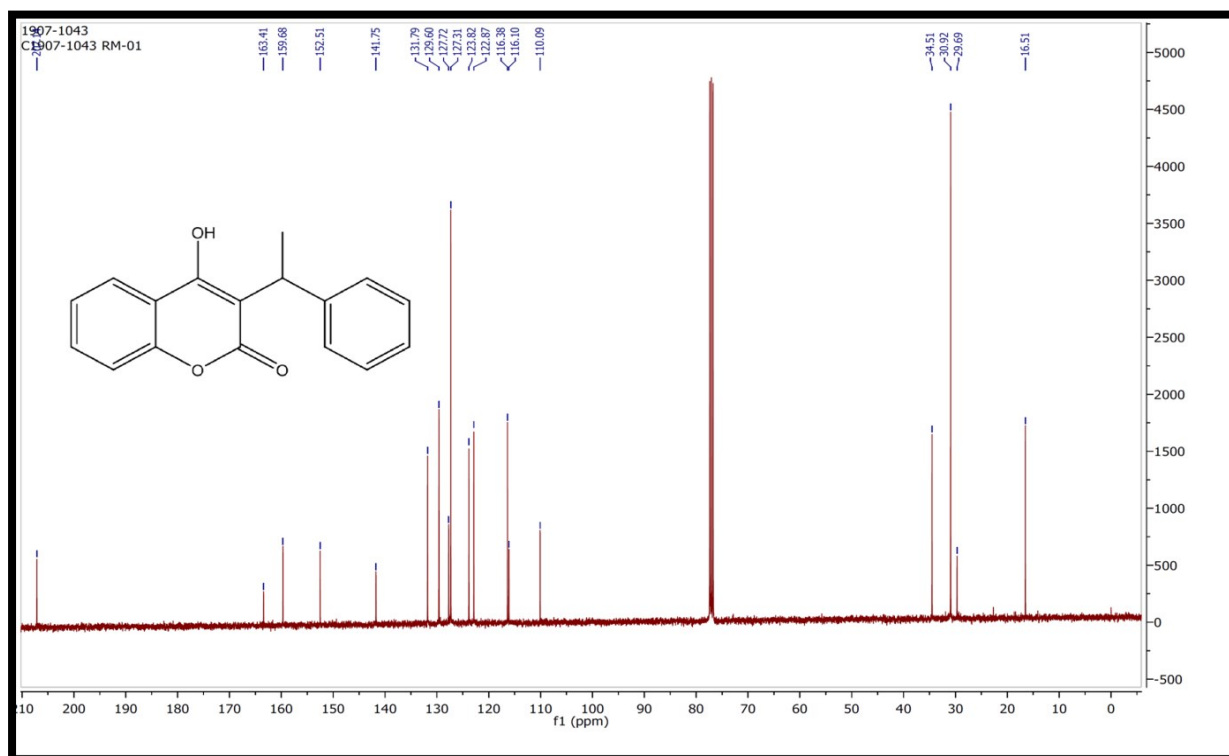

## 2) <sup>1</sup>H-NMR of 3-(1-(4-fluorophenyl)ethyl)-4-hydroxy-2H-chromen-2-one (3b)

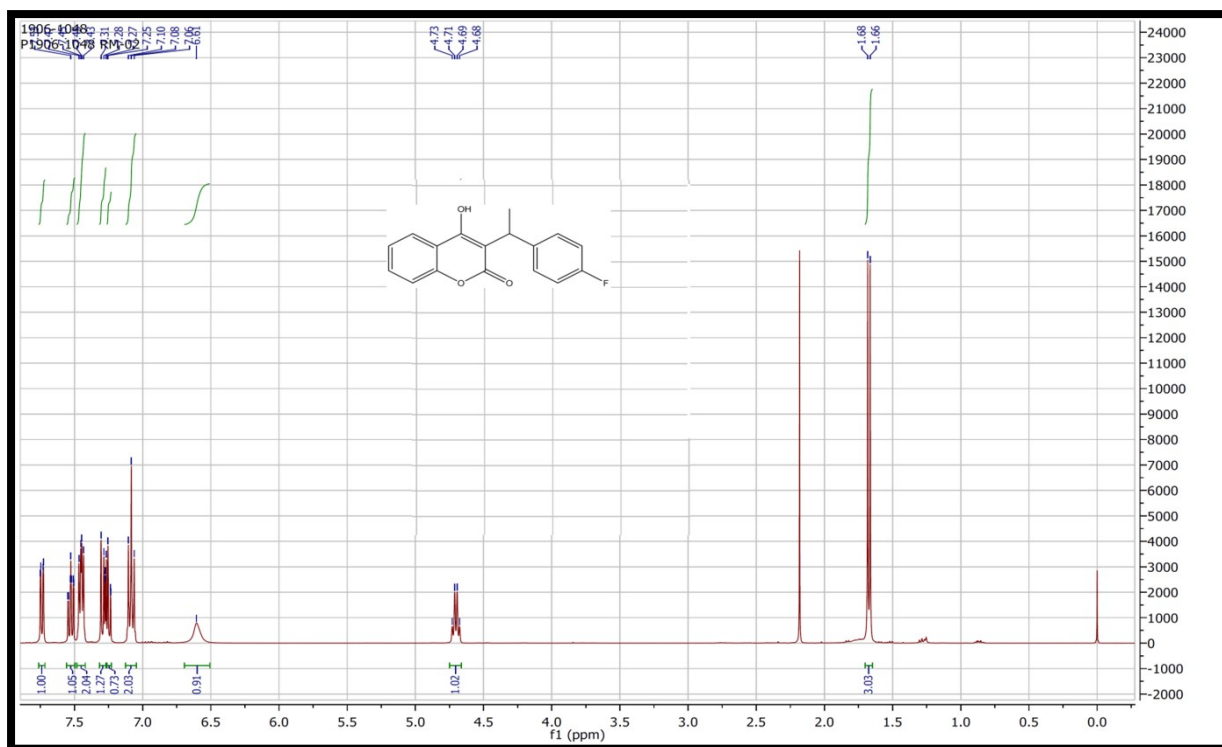

## <sup>13</sup>C-NMR of 3-(1-(4-fluorophenyl)ethyl)-4-hydroxy-2H-chromen-2-one (3b)

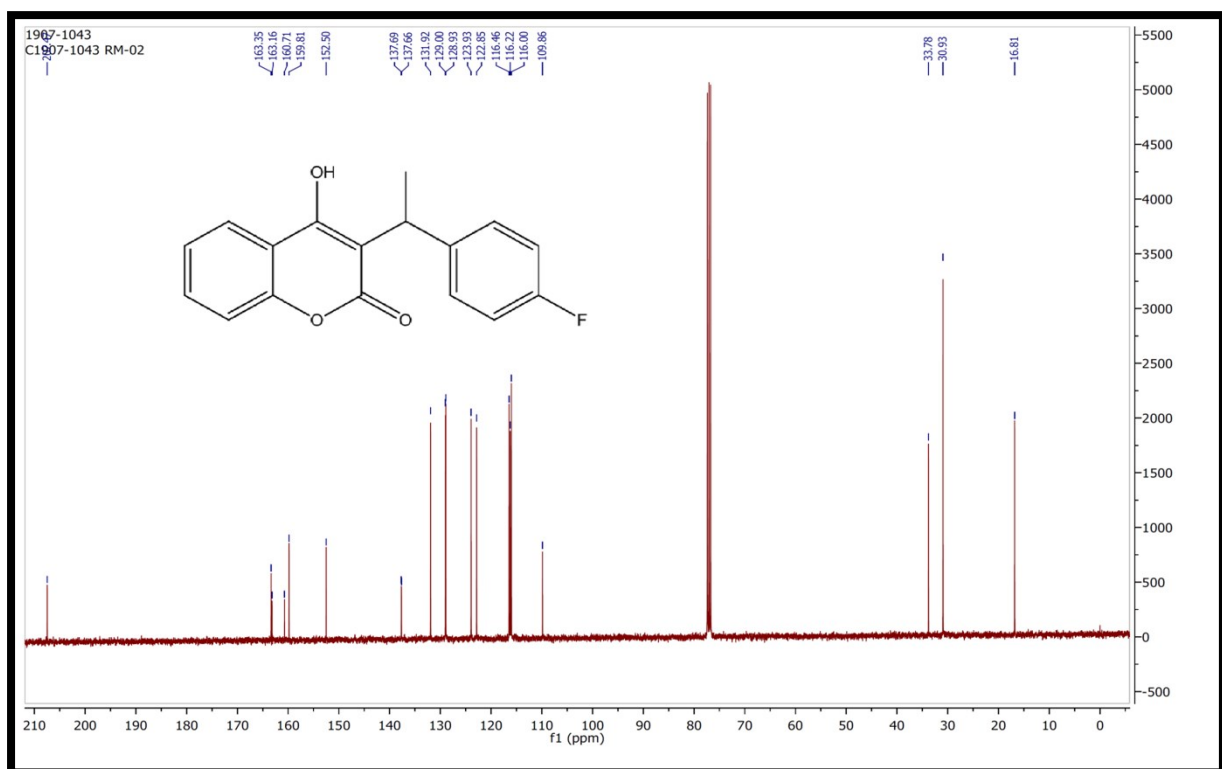

### 3) <sup>1</sup>H-NMR of 3-benzhydryl-4-hydroxy-2H-chromen-2-one (3c)

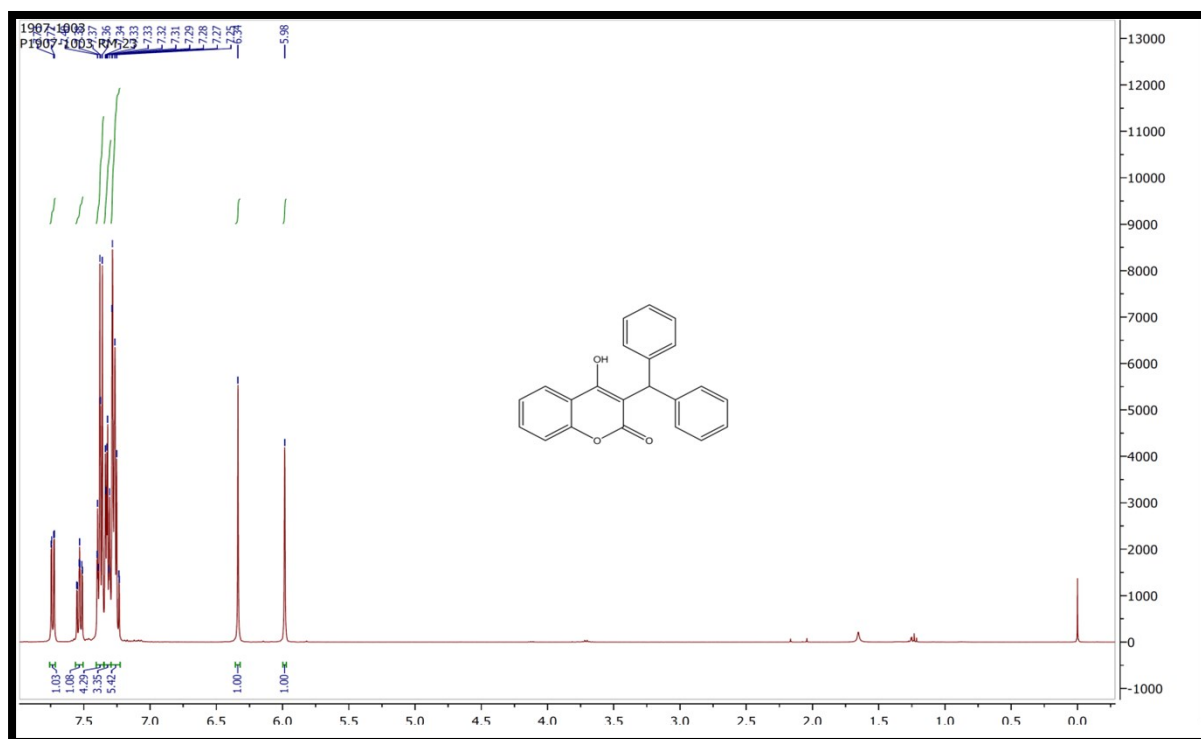

### <sup>13</sup>C-NMR of 3-benzhydryl-4-hydroxy-2H-chromen-2-one (3c)

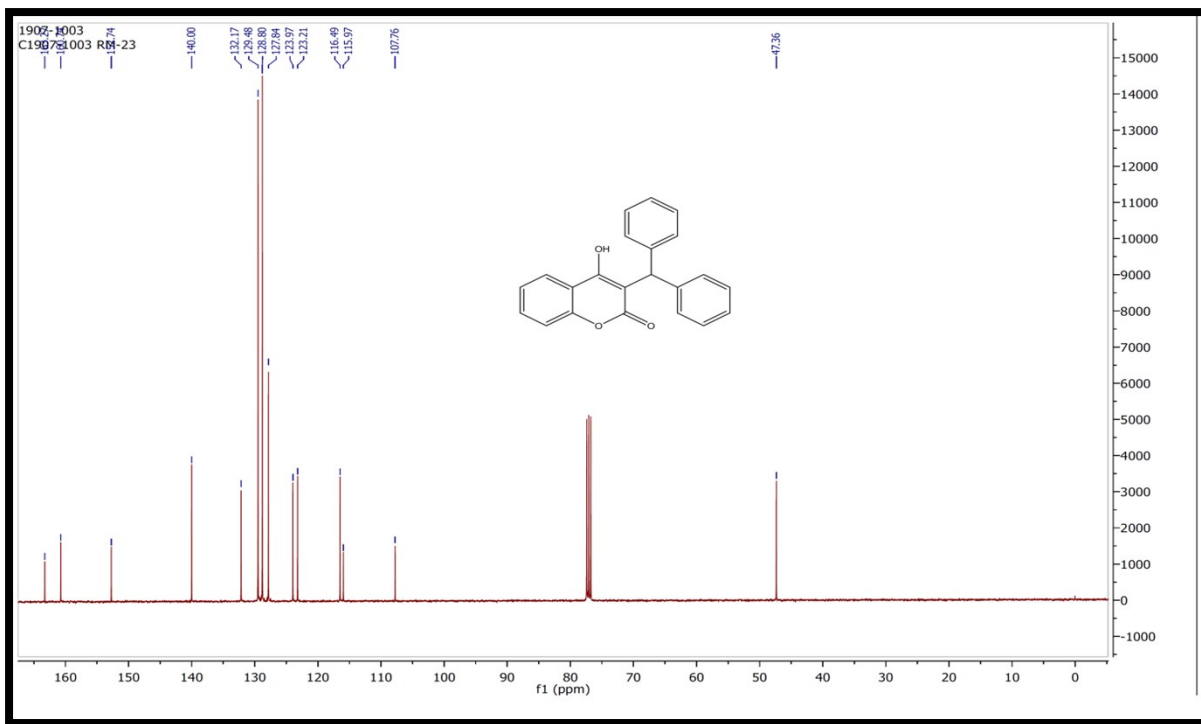

#### 4) <sup>1</sup>H-NMR of 3-(bis(4-fluorophenyl)methyl)-4-hydroxy-2H-chromen-2-one (3d)

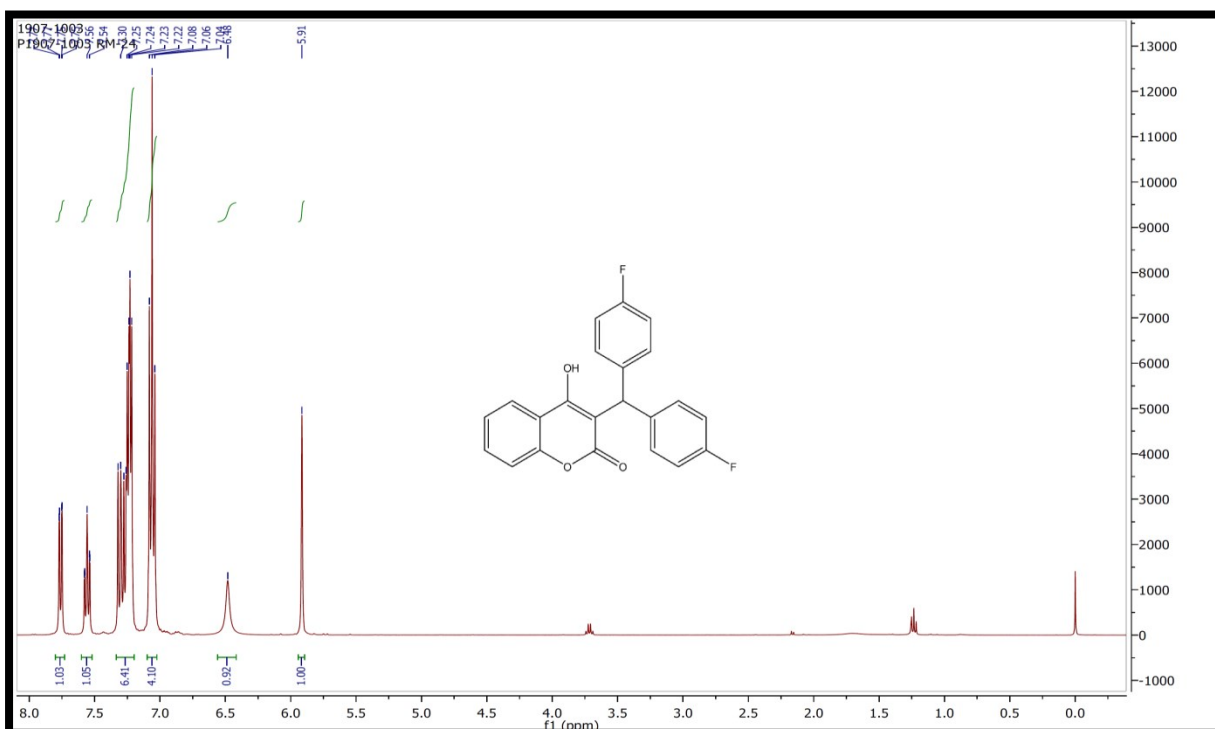

#### <sup>13</sup>C-NMR of 3-(bis(4-fluorophenyl)methyl)-4-hydroxy-2H-chromen-2-one (3d)

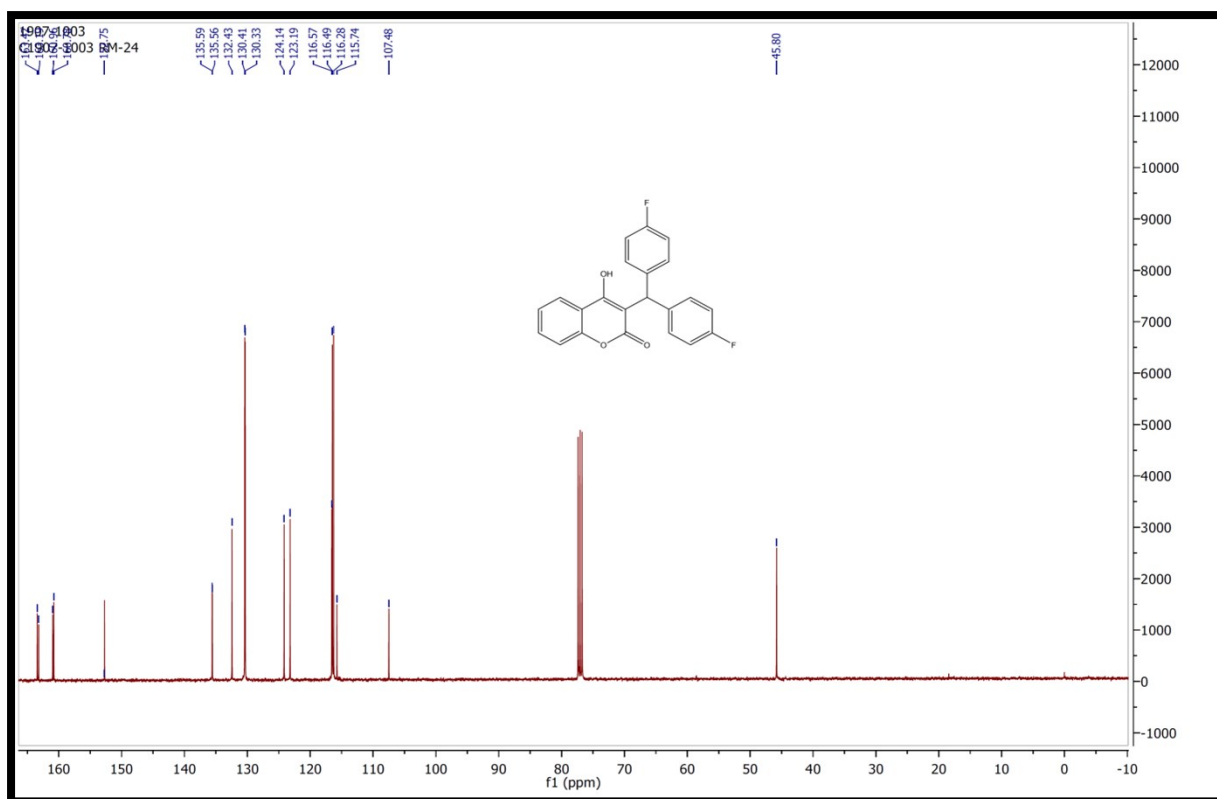

**5) <sup>1</sup>H-NMR of 4-hydroxy-3-(1-(4-methoxyphenyl)ethyl)-2H-chromen-2-one (3e)**

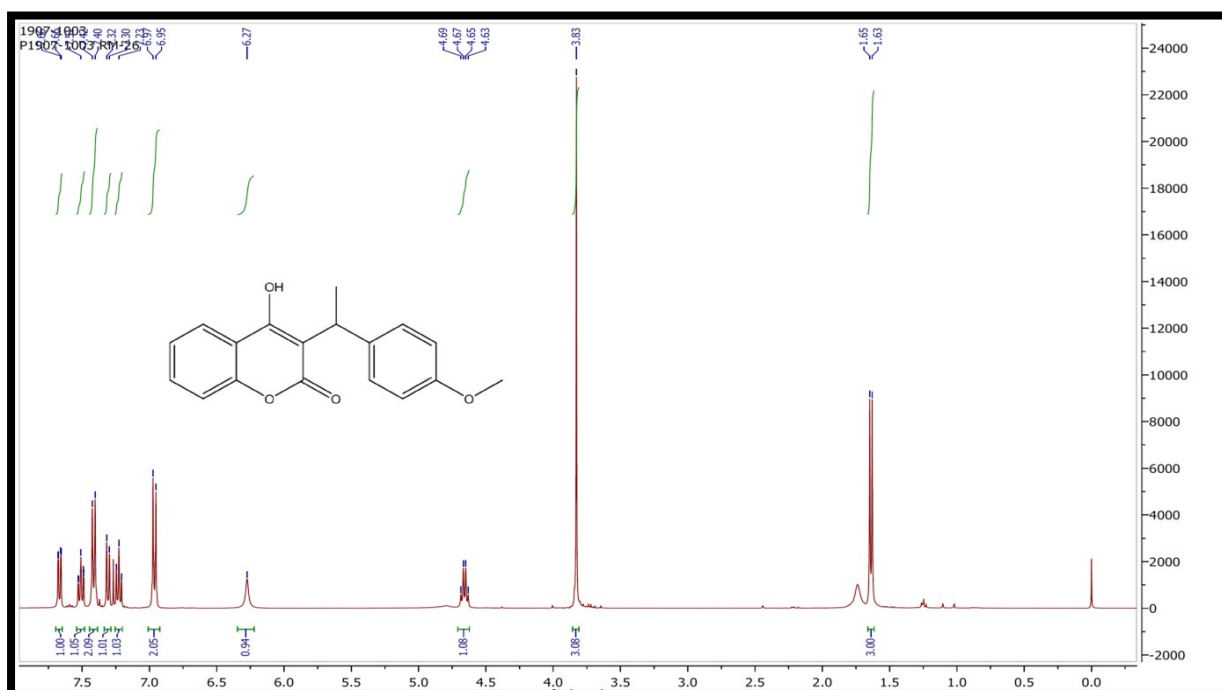

**<sup>13</sup>C-NMR of 4-hydroxy-3-(1-(4-methoxyphenyl)ethyl)-2H-chromen-2-one (3e)**

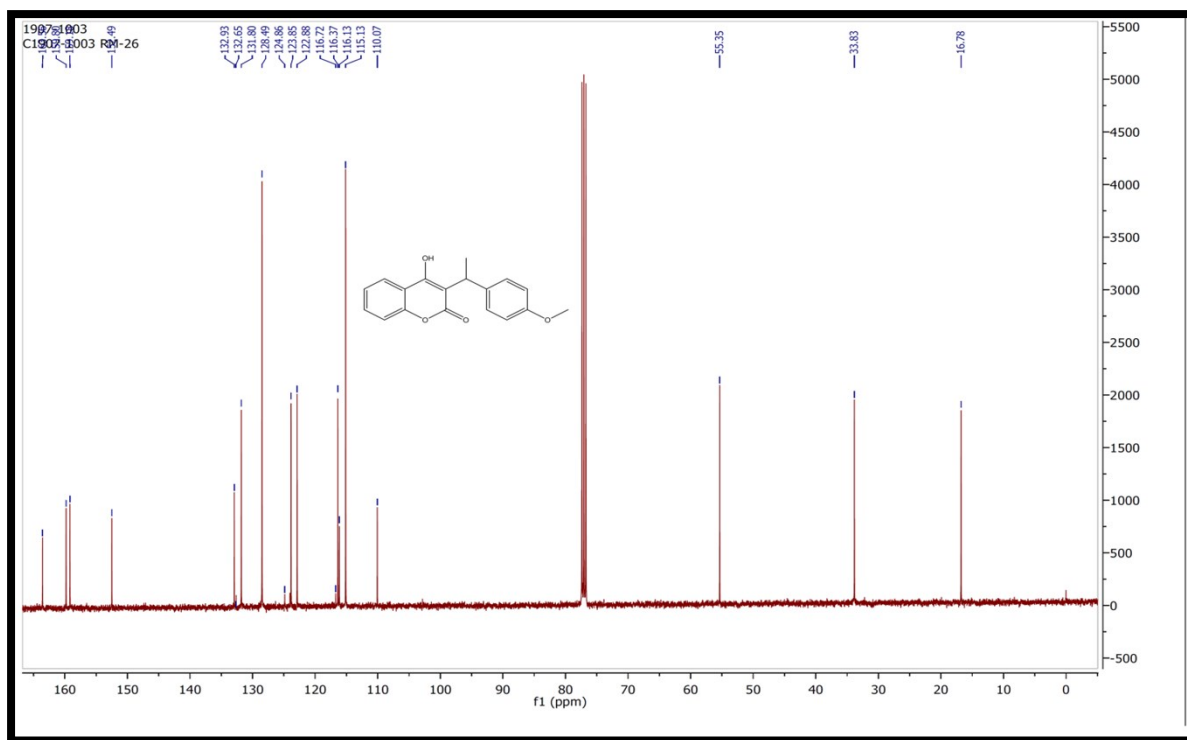

6) <sup>1</sup>H-NMR of 2-amino-7,7-dimethyl-5-oxo-4-phenyl-5,6,7,8-tetrahydro-4H-chromene-3-carbonitrile (7a)

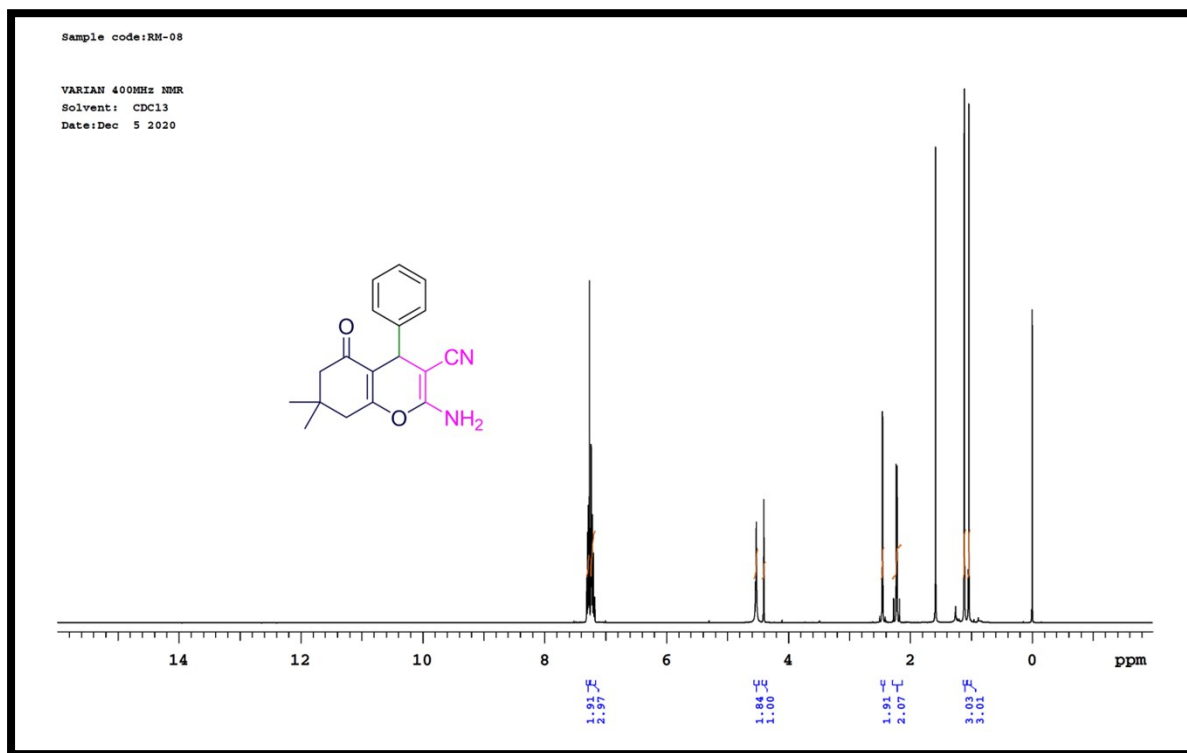

7) <sup>1</sup>H-NMR of 2-amino-4-(4-methoxyphenyl)-7,7-dimethyl-5-oxo-5,6,7,8-tetrahydro-4H-chromene-3-carbonitrile (7b)

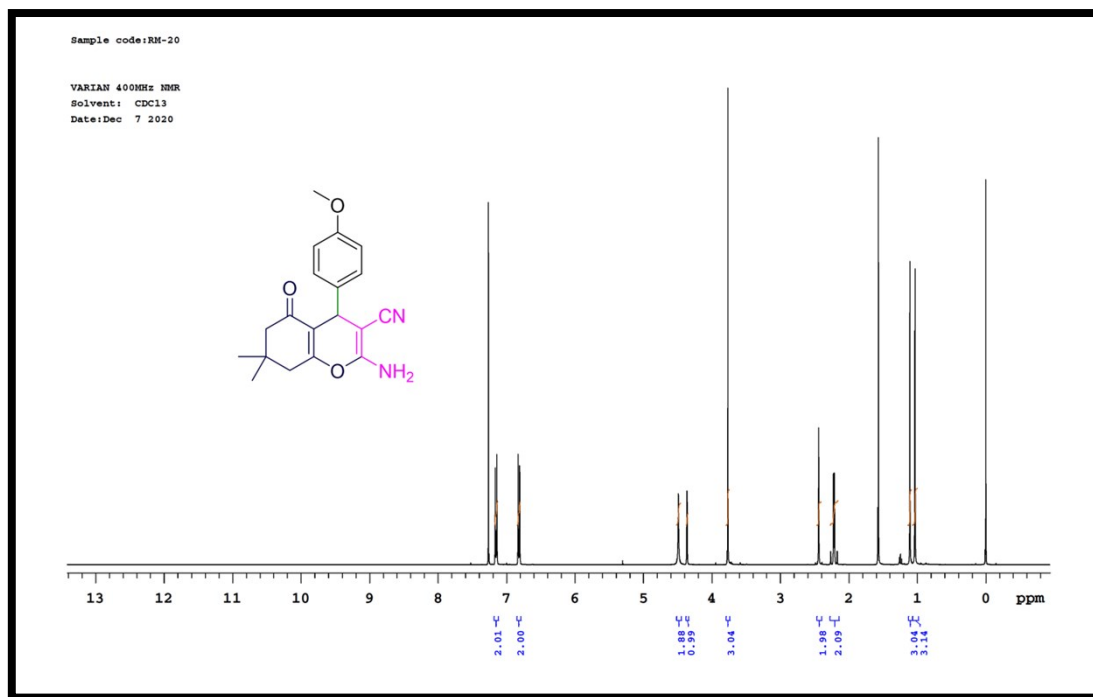

8) <sup>1</sup>H-NMR of 2-amino-4-(4-bromophenyl)-7,7-dimethyl-5-oxo-5,6,7,8-tetrahydro-4H-chromene-3-carbonitrile (7c)

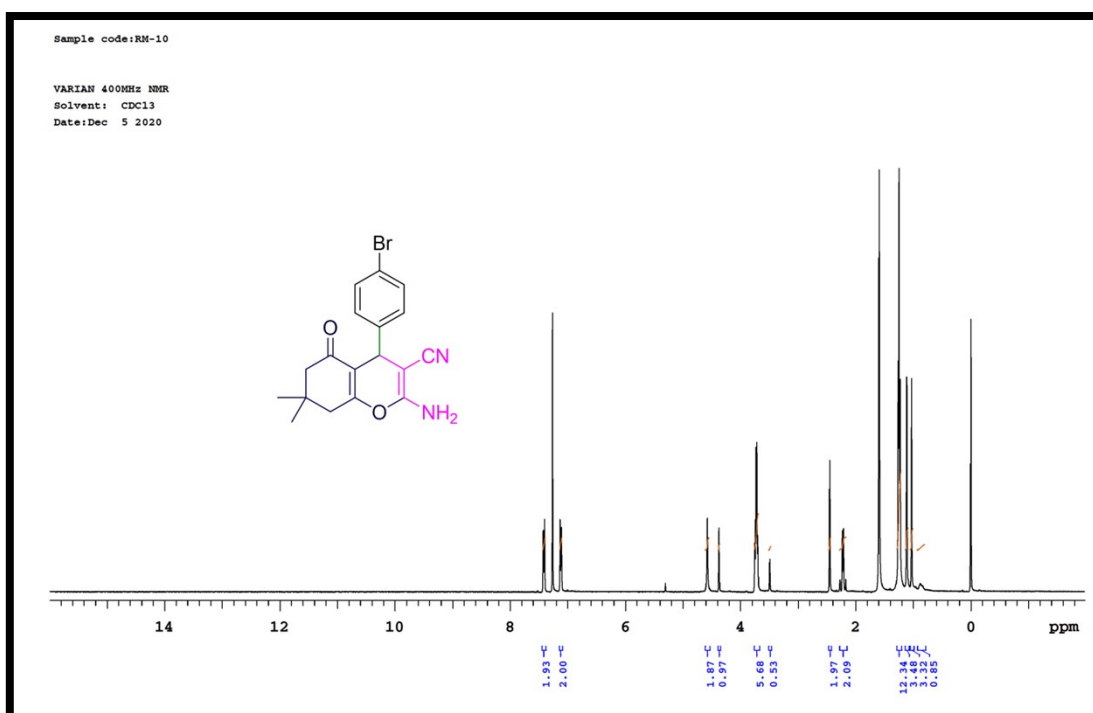



9)<sup>1</sup>H-NMR of 2-amino-7,7-dimethyl-4-(4-nitrophenyl)-5-oxo-5,6,7,8-tetrahydro-4H-chromene-3-carbonitrile (7d)

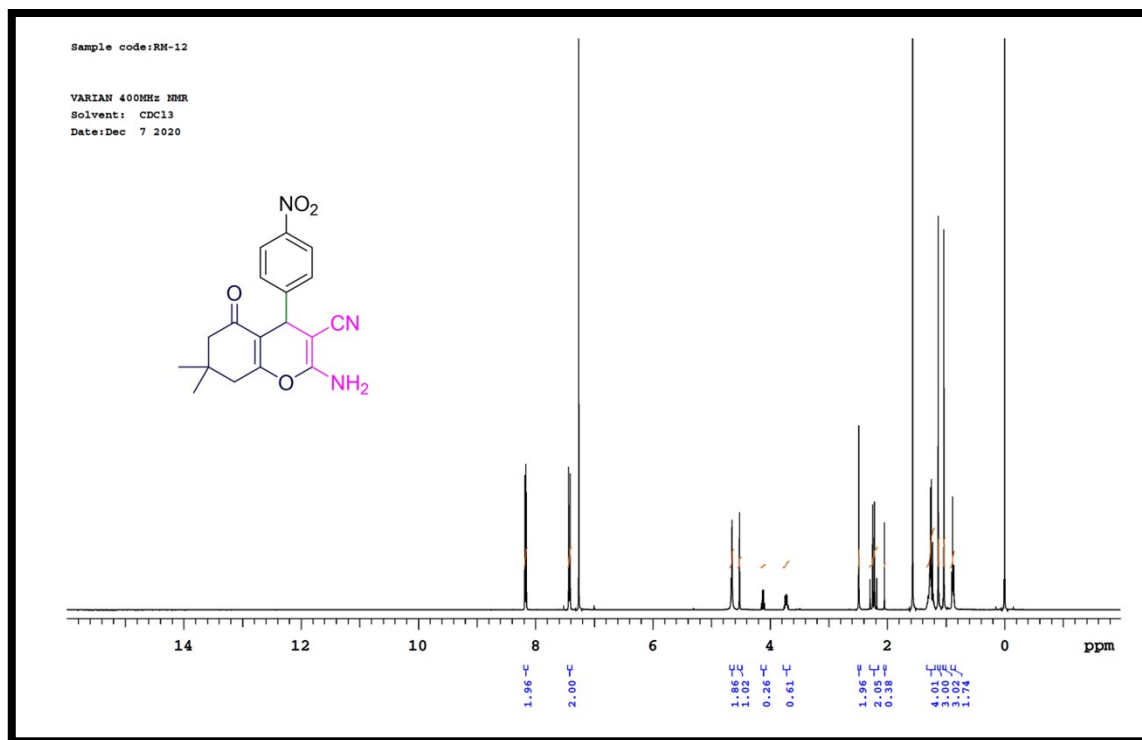

10)<sup>1</sup>H-NMR of 2-amino-4-(3,4-dimethoxyphenyl)-7,7-dimethyl-5-oxo-5,6,7,8-tetrahydro-4H-chromene-3-carbonitrile (7e)

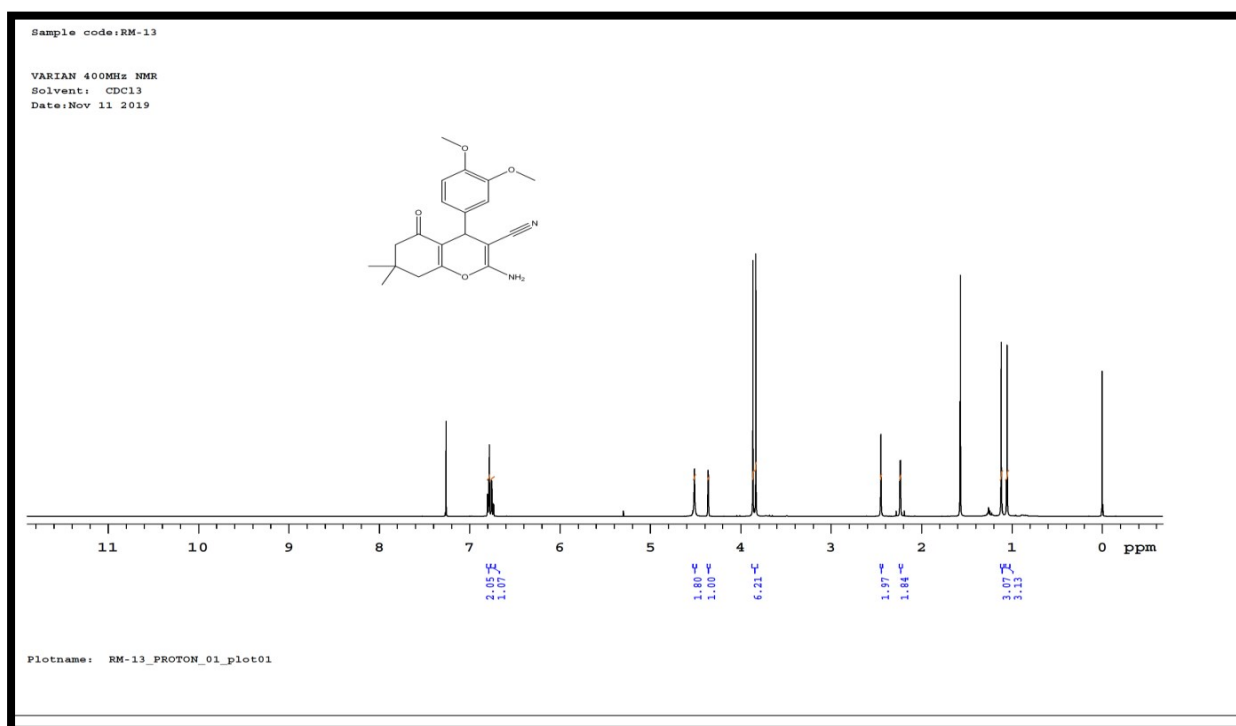

11)  $^1\text{H-NMR}$  of 2-amino-4-(3-methoxyphenyl)-7,7-dimethyl-5-oxo-5,6,7,8-tetrahydro-4H-chromene-3-carbonitrile (7f)

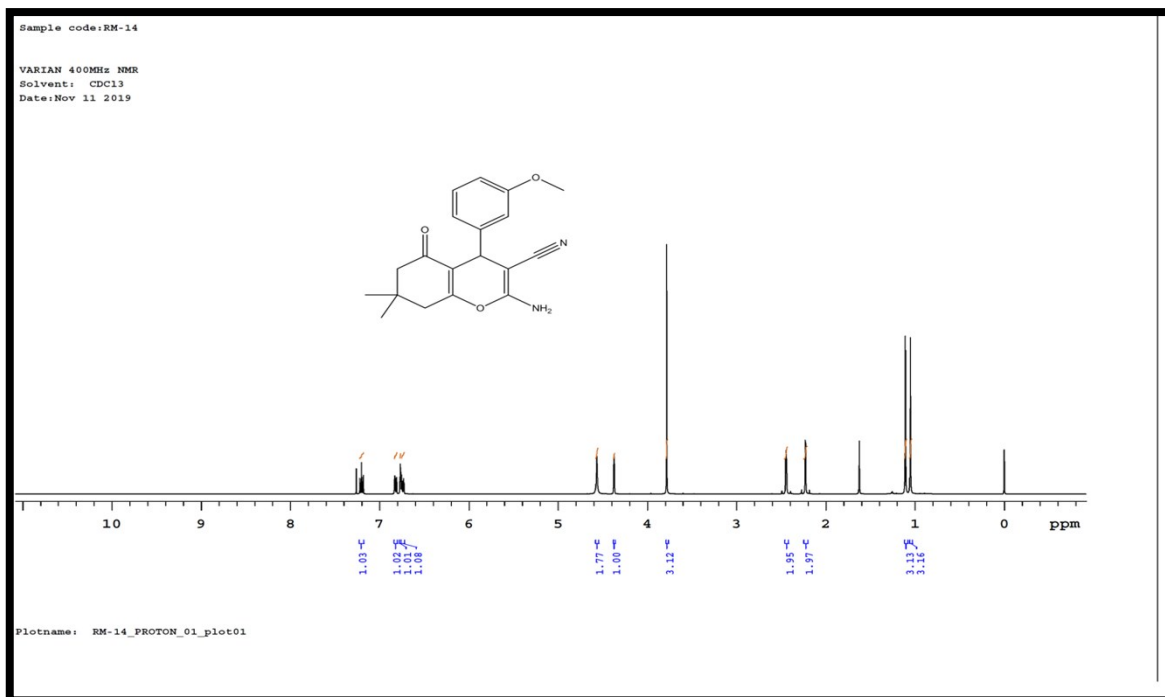

12)  $^1\text{H-NMR}$  of 2-amino-4-(3,5-dimethoxyphenyl)-7,7-dimethyl-5-oxo-5,6,7,8-tetrahydro-4H-chromene-3-carbonitrile (7g)

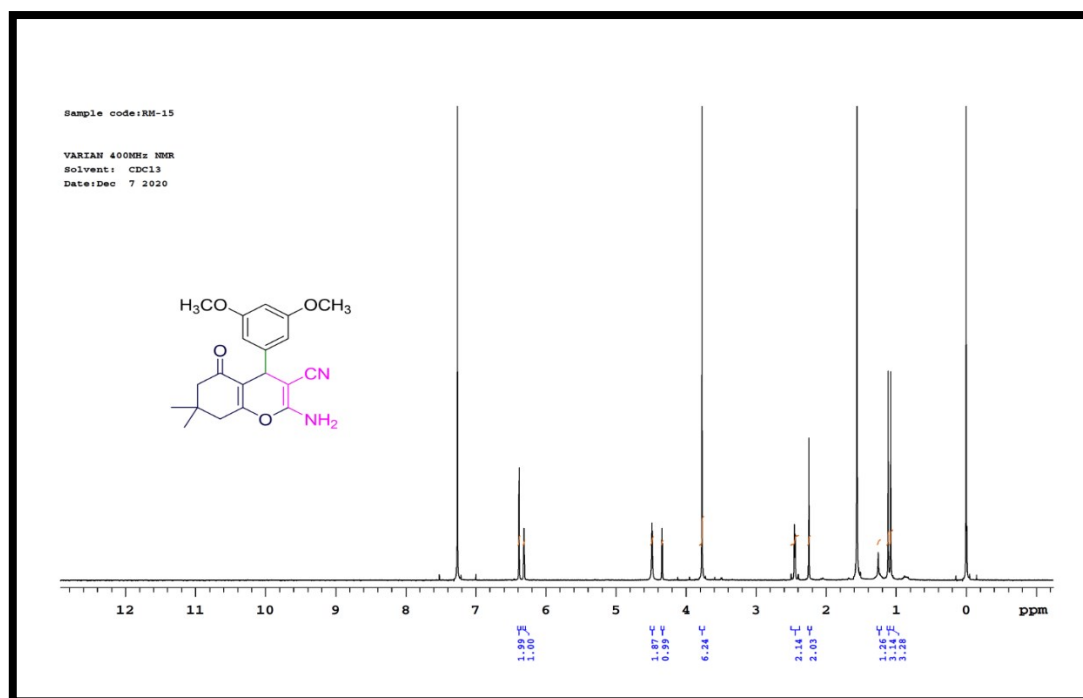

13) <sup>1</sup>H-NMR of 2-amino-4-(3-bromophenyl)-7,7-dimethyl-5-oxo-5,6,7,8-tetrahydro-4H-chromene-3-carbonitrile (7h).

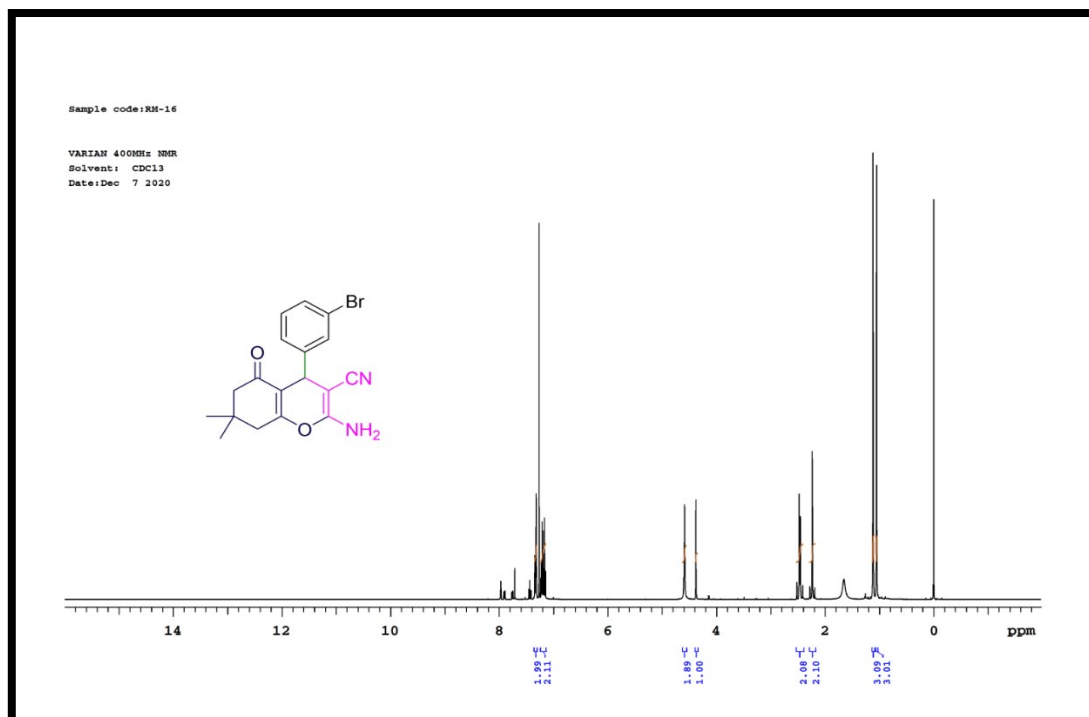

14) <sup>1</sup>H-NMR of 2-amino-4-(4-fluorophenyl)-7,7-dimethyl-5-oxo-5,6,7,8-tetrahydro-4H-chromene-3-carbonitrile (7i)

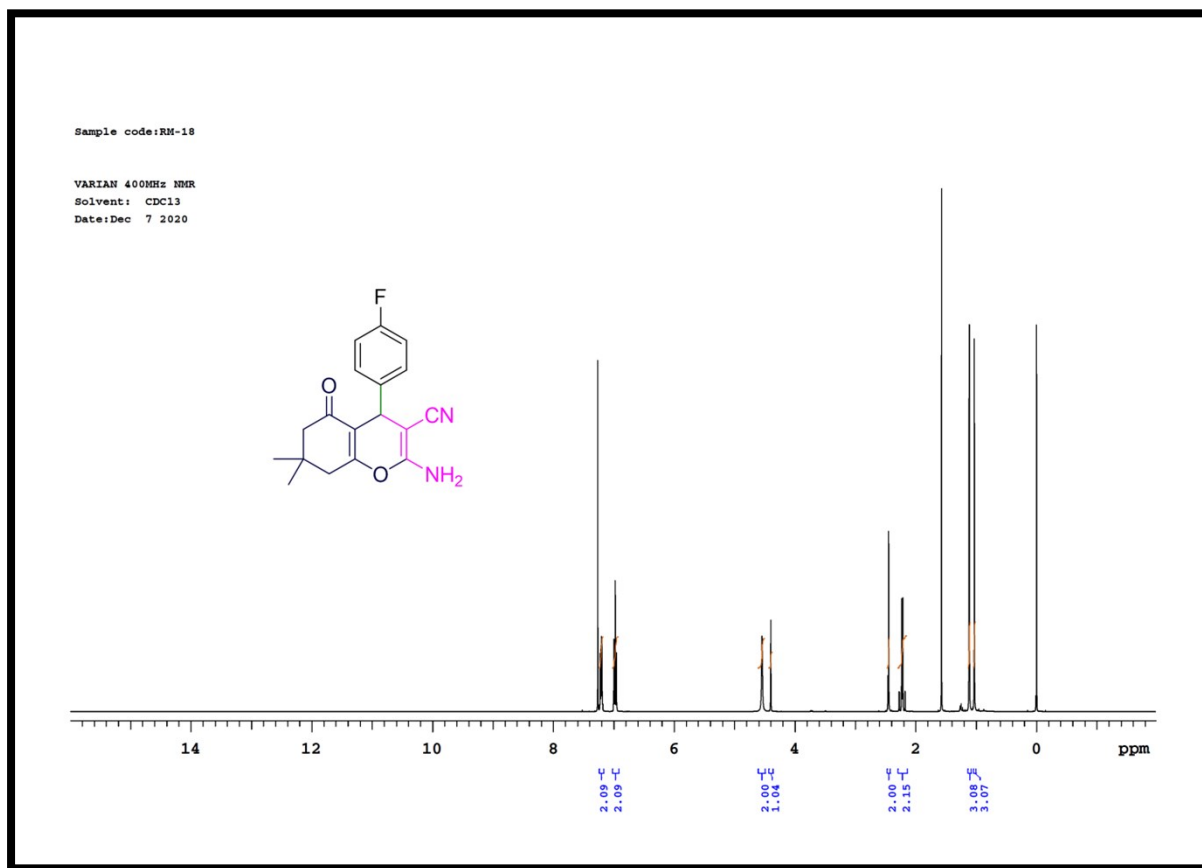

15)  $^1\text{H-NMR}$  of 2-amino-7,7-dimethyl-5-oxo-4-(3,4,5-trimethoxyphenyl)-5,6,7,8-tetrahydro-4H-chromene-3-carbonitrile (7j)

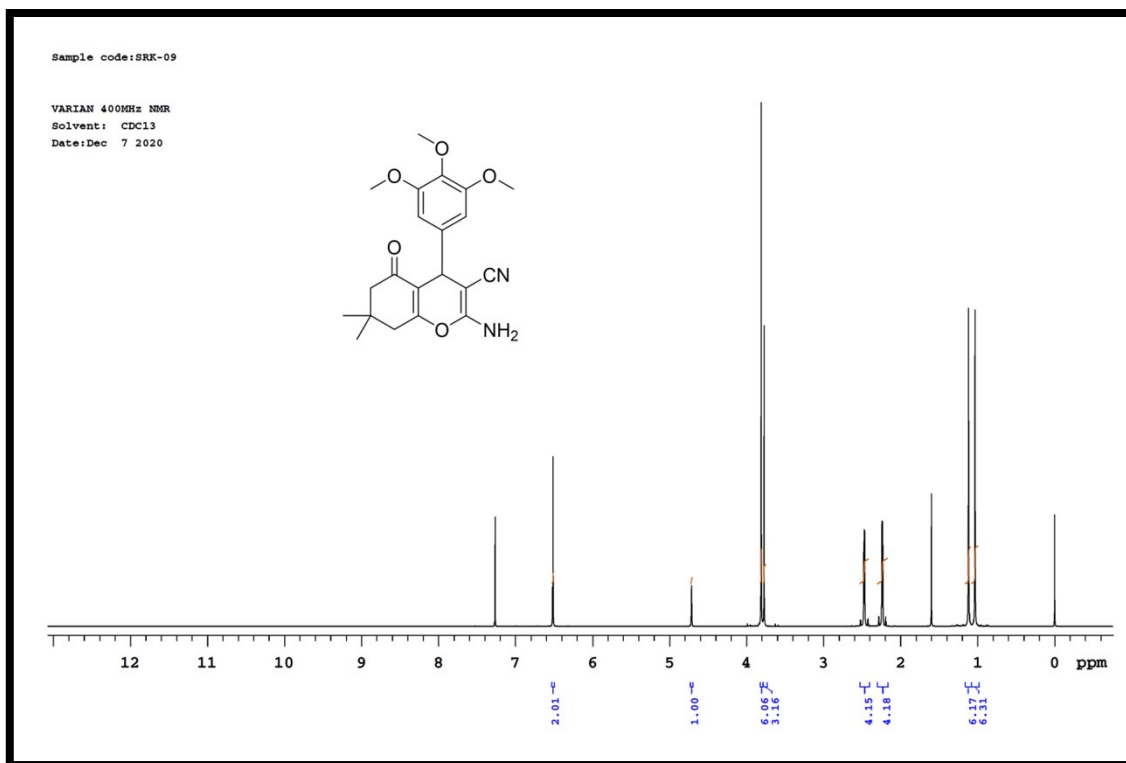

16)  $^1\text{H-NMR}$  of 9-(2-chlorophenyl)-3,3,6,6-tetramethyl-3,4,5,6,7,9-hexahydro-1H-xanthene-1,8(2H)-dione (8a)

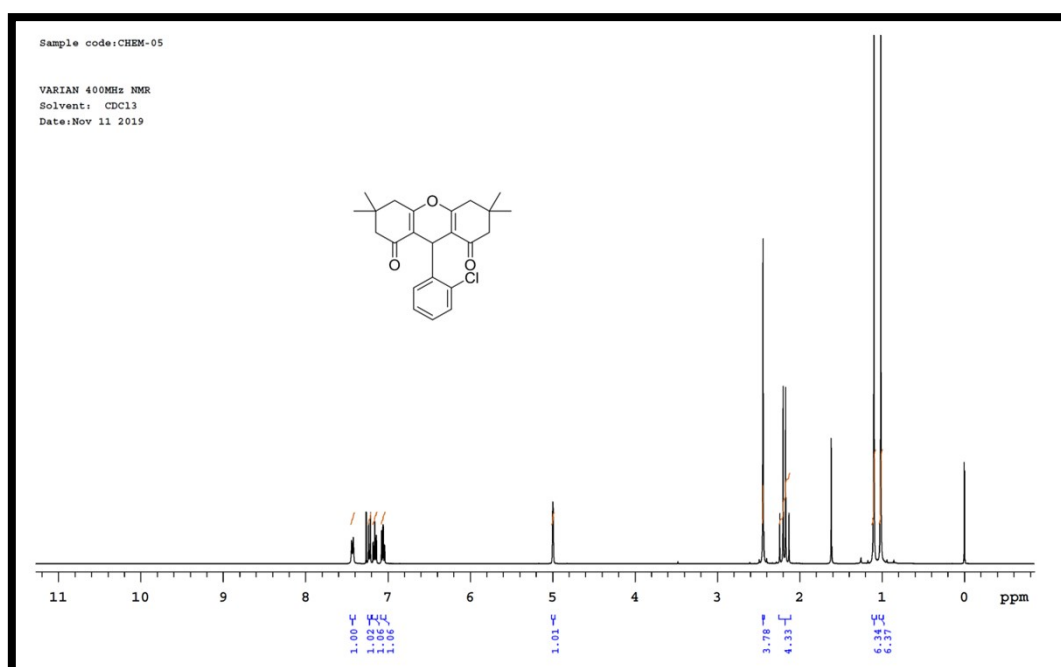

17) <sup>1</sup>H-NMR of 9-(2,4-dichlorophenyl)-3,3,6,6-tetramethyl-3,4,5,6,7,9-hexahydro-1H-xanthene-1,8(2H)-dione (8b)

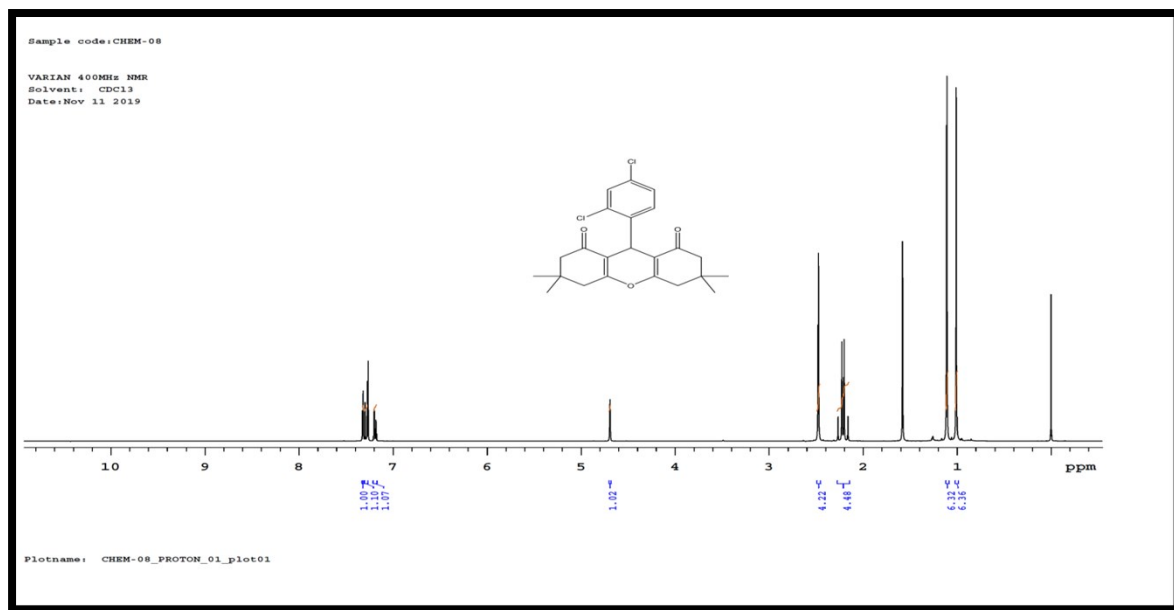

18) <sup>1</sup>H-NMR of 9-(4-chlorophenyl)-3,3,6,6-tetramethyl-3,4,5,6,7,9-hexahydro-1H-xanthene-1,8(2H)-dione (8c)

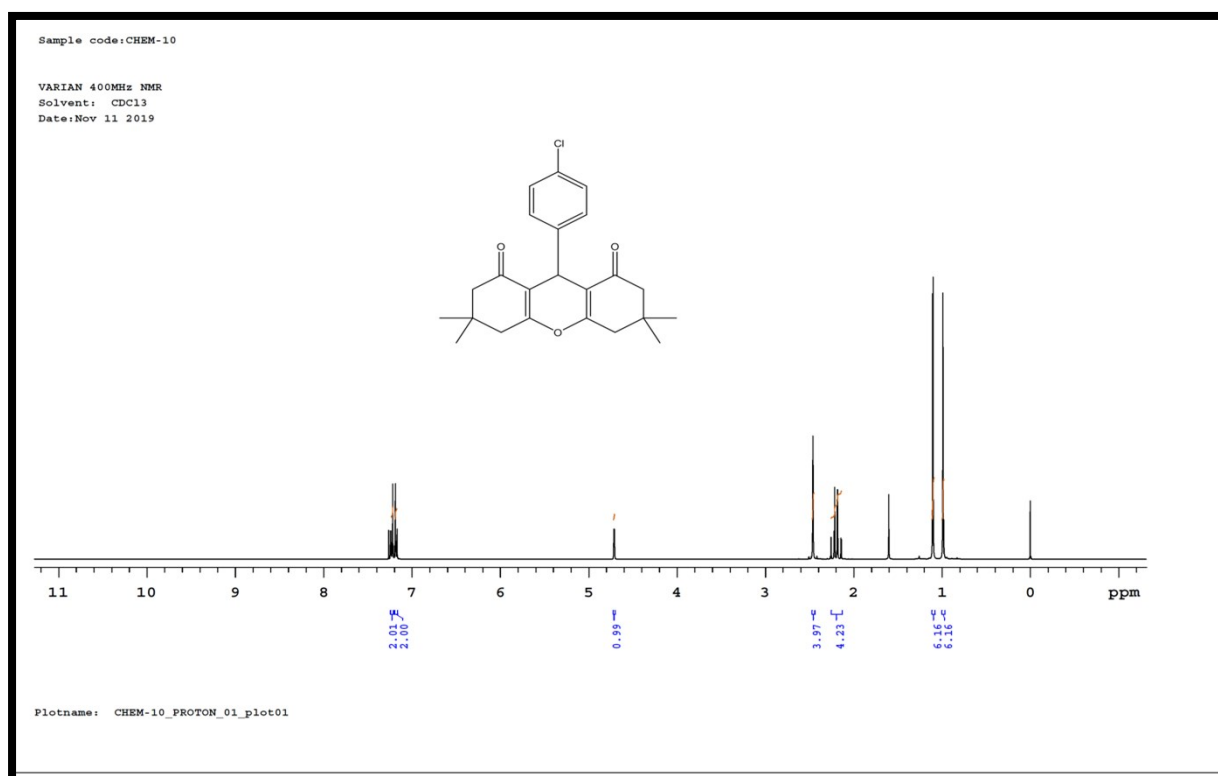

19) <sup>1</sup>H-NMR of 9-(4-bromophenyl)-3,3,6,6-tetramethyl-3,4,5,6,7,9-hexahydro-1H-xanthene-1,8(2H)-dione (8d)

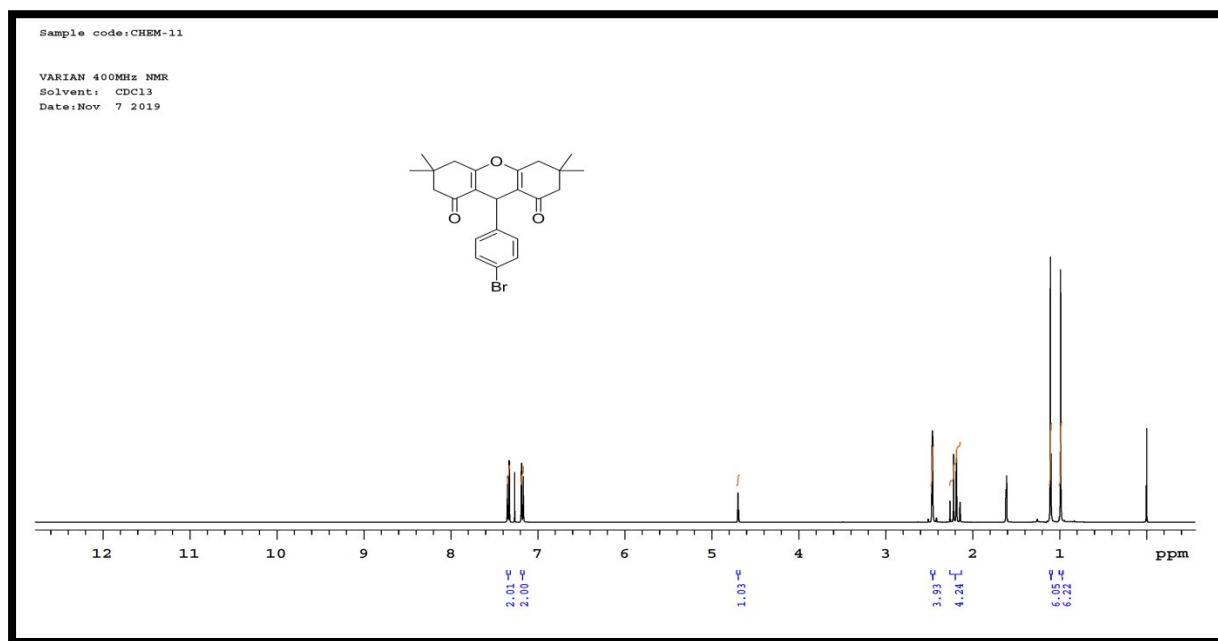

20) <sup>1</sup>H-NMR of 3,3,6,6-tetramethyl-9-(3-nitrophenyl)-3,4,5,6,7,9-hexahydro-1H-xanthene-1,8(2H)-dione (8e)

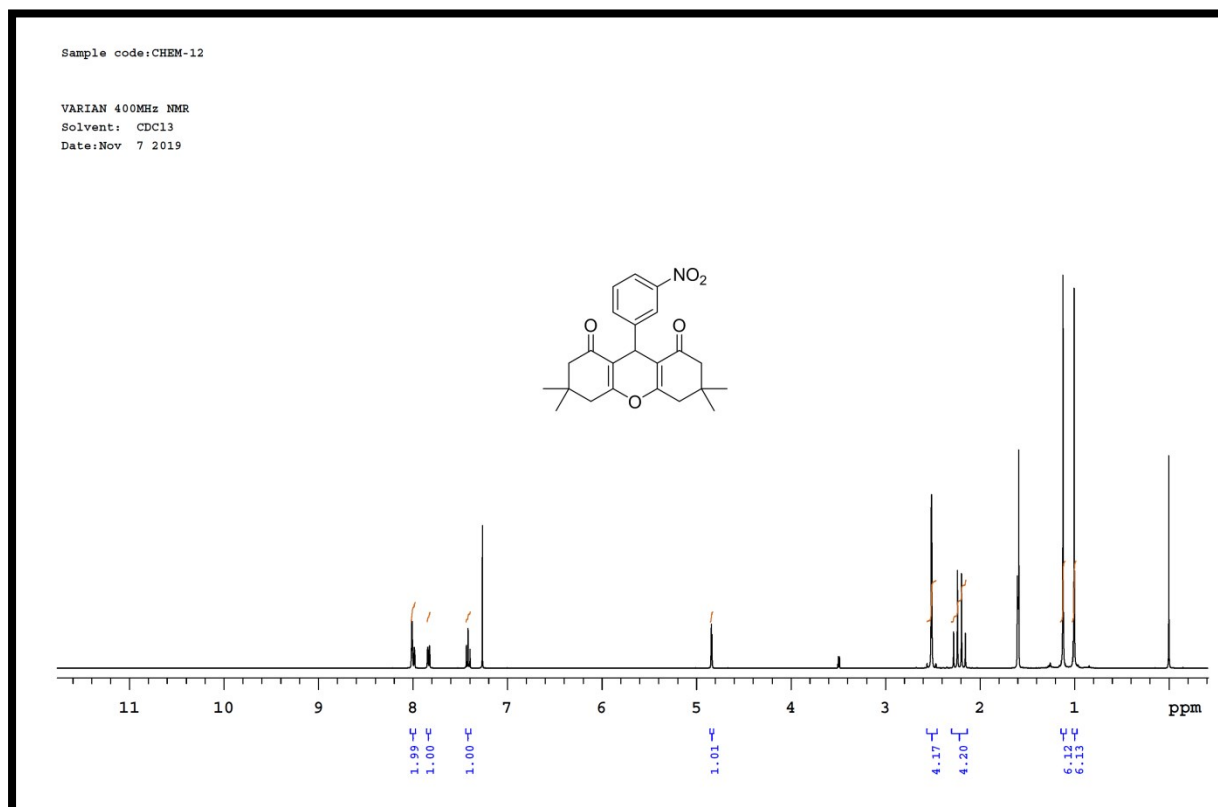

21)  $^1\text{H-NMR}$  of 3,3,6,6-tetramethyl-9-p-tolyl-3,4,5,6,7,9-hexahydro-1H-xanthene-1,8(2H)-dione (8f)

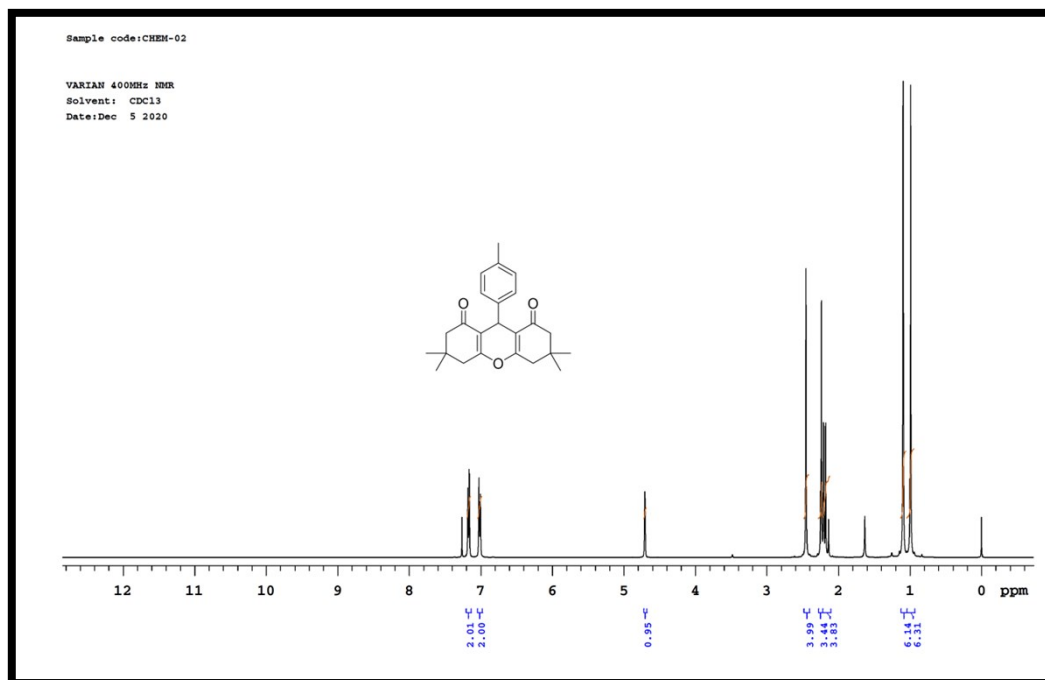

22)  $^1\text{H-NMR}$  of 3,3,6,6-tetramethyl-9-(2,3,4-trimethoxyphenyl)-3,4,5,6,7,9-hexahydro-1H-xanthene-1,8(2H)-dione (8g)

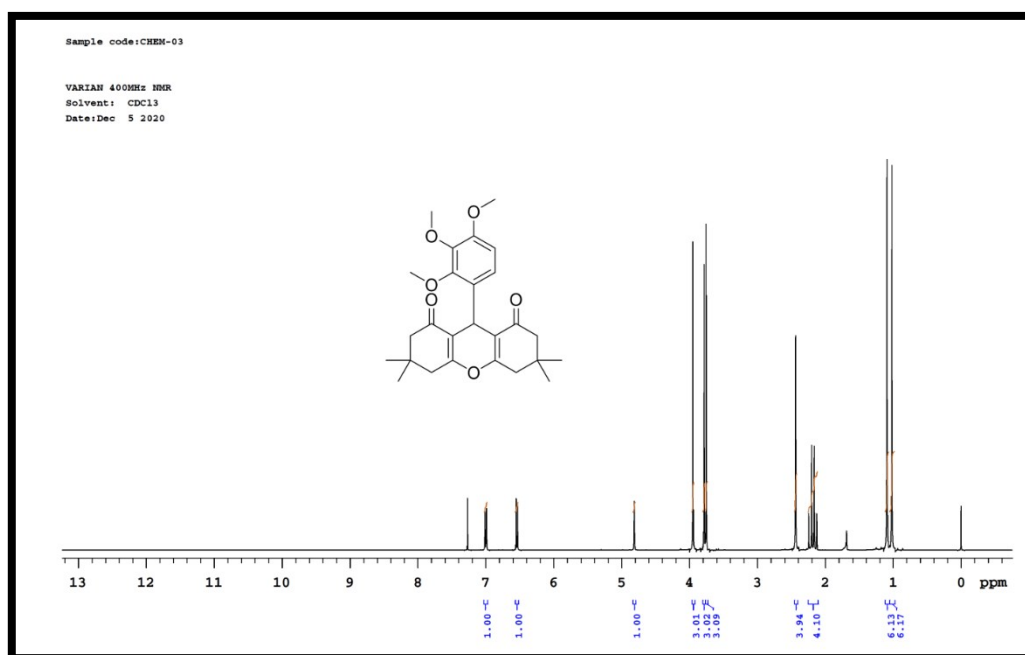



23) <sup>1</sup>H-NMR of 3,3,6,6-tetramethyl-9-(4-nitrophenyl)-3,4,5,6,7,9-hexahydro-1H-xanthene-1,8(2H)-dione (8h)

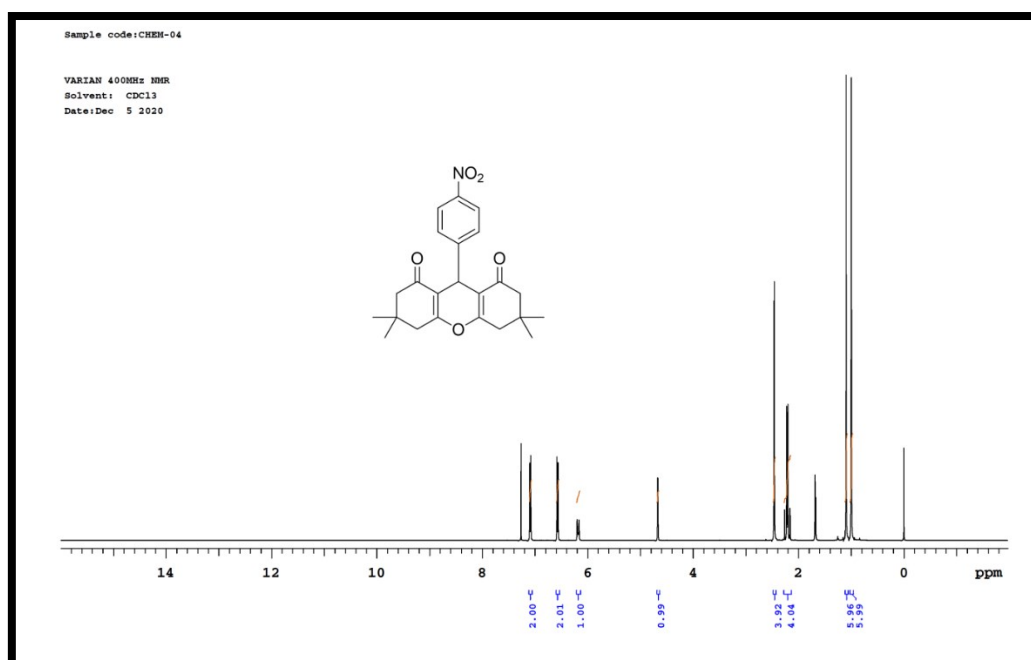

24) <sup>1</sup>H-NMR of 3,3,6,6-tetramethyl-9-(3,4,5-trimethoxyphenyl)-3,4,5,6,7,9-hexahydro-1H-xanthene-1,8(2H)-dione. (8i)

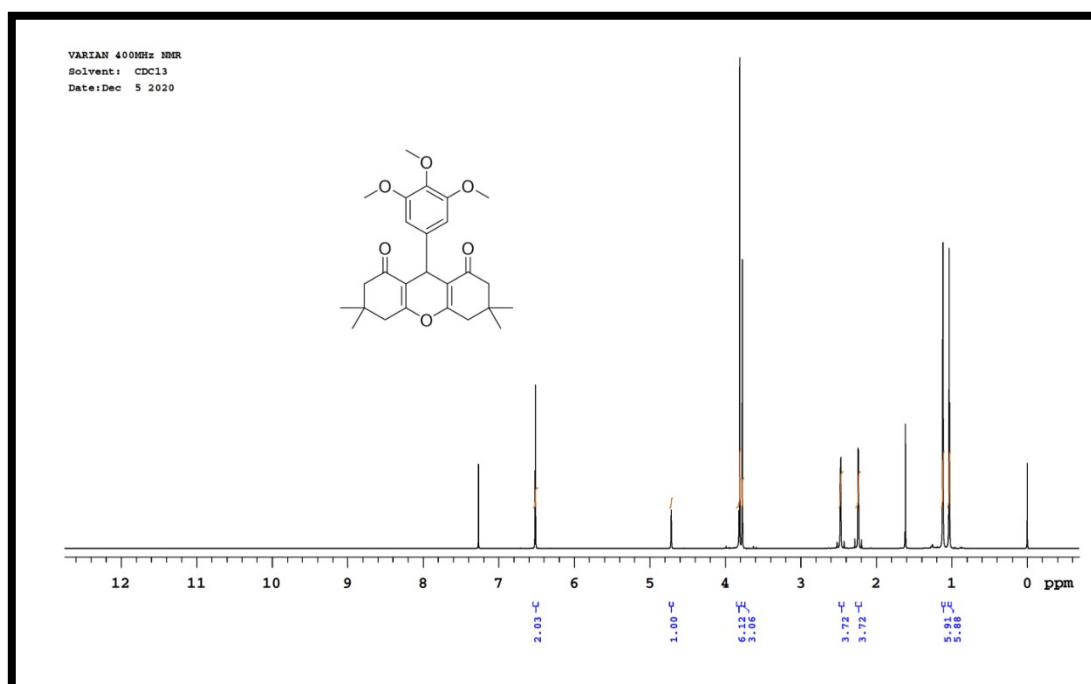

25) <sup>1</sup>H-NMR of 9-(3,4-dimethoxyphenyl)-3,3,6,6-tetramethyl-3,4,5,6,7,9-hexahydro-1H-xanthene-1,8(2H)-dione (8j)

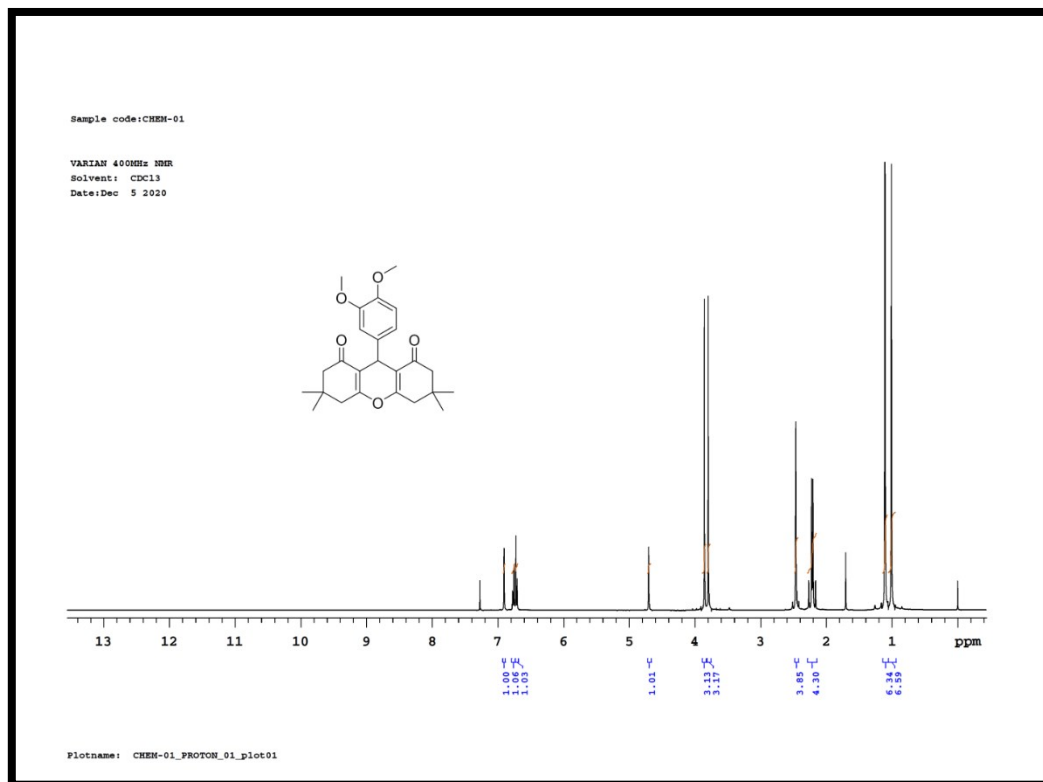

## References

- [1] M. Rueping, J. B. Nachtsheim, E. Sugiono, *Synlett*, 2010, 10, 1549–1553...
- [2] X. Lin, X. Dai, Z. Mao, Y. Wang, *Tetrahedron*, 2009, 65, 9233–9237.
- [3] G. Aridoss, K. K. Laali, *Tetrahedron Letters*, 2011, 52, 6859–6864.
- [4] C. R. Reddy, B. Srikanth, N. N. Rao, D. S. Shin, *Tetrahedron*, 2008, 64, 11666–11672.
- [5] A. M. Al-Enizi, T. A. J. Siddiqui, S. F. Shaikh, M. Ubaidullah, Y. Ayman, R. S. Mane, A. H. S. Rana, *RSC Adv.*, 2020, 10, 14826–14836.
- [6] V. Narayana, R. Varala, P. Zubaidha, *International Journal of Organic Chemistry*, 2012, 2, 287–294.
- [7] S. Zavar, *Arabian J. Chem.*, 2017, 10, S67.

- [8] G. Brahmachari, B. Banerjee, *ACS Sustainable Chem. Eng.*, 2014, 2, 411.
- [9] M. R. N. Jamal, S. Mashkouri, A. Sharifi, *Mol. Divers.*, 2010, 14, 473-477.
- [10] C. W. Lu, J. J. Wang, F. Li, S. J. Yu, *Res. Chem. Intermed.* 2018, 44, 1035.
- [11] G. Sabitha, K. Arundhati, K. Sudhakar, B. S. Sastri, J. S. Yadav, *Synth. Commun.*, 2009, 39, 433-442.
- [12] I. A. Azath, P. Puthiaraj, K. Pitchumani, *ACS Sustainable Chem. Eng.*, 2013, 1, 174-179.
- [13] S. Abdolmohammadi, S. Balalaie, *Tetrahedron Lett.*, 2007, 48, 3299.
- [14] H. Mehrabi, M. K. Mireki, *Chin. Chem. Lett.*, 2011, 22, 1419.
- [15] E. Sheikhhosseini, D. Ghazanfari, V. Nezamabadi, *Iran. J. Catal.*, 2013, 3, 197-201.
- [16] S. Gao, C.H. Tsai, C. Tseng, C.F. Yao, *Tetrahedron.*, 2008, 64, 9143-9149.
- [17] R.S. Bhosale, C.V. Magar, K.S. Solanke, S.B. Mane, S.S. Choudhary, R.P. Pawar, *Synth. Commun.*, 2007, 37, 4353.
- [18] A. T. Khan, M. Lal, S. Ali, M. M. Khan, *Tetrahedron Lett.*, 2011, 52, 5327-5332
- [19] F. N. Sadeh, M. T. Maghsoodlou, N. Hazeri, M. Kangani, *Res. Chem. Intermed.*, 2015, 41, 5907-5914.
- [20] M. A. Bodaghifard, M. Solimannejad, S. Asadbegi, S. Dolatabadifarahani, *Res. Chem. Intermed.*, 2016, 42, 1165.
- [21] A. Mobinikhaledi, M. A. BodaghiFard, *Acta Chimica Slovenica.*, 2010, 57, 931-935.
- [22] M. G. Dekamin, M. Eslami, A. Maleki, *Tetrahedron.*, 2013, 69, 1074-1085.
- [23] N. Hazeri, M. T. Maghsoodlou, F. Mir, M. Kangani, H. Saravani, E. Molashahi, *Chinese Journal of Catalysis.*, 2014, 35, 391-395.
- [24] V. M. Joshi, R. L. Magar, P. B. Throat, S.U. Tekale, B. R. Patil, M. P. Kale, R. P. Pawar, *Chinese Chemical Letters.*, 2014, 25, 455-458.
- [25] X. Fan, X. Hu, X. Zhang, *Can. J. Chem.*, 2005, 83, 16.
- [26] G. Casiraghi, G. Casnati, M. Catellani, M. Corina, *Synthesis.*, 1974, 8, 564.

- [27] B. Das, P. Thirupathi, I. Mahender, *J. Mol. Catal. A: Chem.*, 2006, 247, 233.
- [28] M. Bigdeli., *Chinese Chemical Letters.*, 2010, 21, 1180–1182.
- [29] J. Safaei-Ghomi and M. A. Ghasemzadeh, *Chinese Chem. Lett.*, 2012, 23, 1225-1229.
- [30] G. R. Chaudhary, P. Bansal, N. Kaur, S.K. Mehta, *RSC Adv.*, 2014,4, 49462-49470.
- [31] A.Ilangovan, S.Malayappasamy, S. Muralidharan<sup>1</sup> and S.Maruthamuthu., *Chem Cent J.*, 2011, 5, 81.
- [32] M.Esmaeilpour, J.Javidi, F.Deighani, F. N.Dodeji., *New J. Chem.*, 2014, 38, 5453-5461.
- [33] B. Das, Ravikanth, R.Ramu, K. Laxminarayana, B. V. Rao, *MolCatalA Chem.*, 2006, 255, 74-77.
- [34] N. Mulakayala, G. P. Kumar, D. Rambabu, M. Aeluri, M. V. B. Rao, M. Pal., *Tetrahedron Letters.*, 2012, 53, 6923–6926.
- [35] A. Ilangovan, S. Muralidharan, P. Sakthivel, S. Malayappasamy, S. Karuppusamy, M. P. Kaushik, *Tetrahedron Lett.*, 2013, 54, 491–494.
- [36] Subodh, N. K. Mogha, K. Chaudhary, G. Kumar, D. T. Masram., *ACS Omega.*, 2018, 3, 16377–16385.
- (37) S. Rezayati, R. Hajinasiri, Z. Erfani, S. Rezayati, S. Afsharisharifabad, *Iran. J. Catal.*, 2014, 4, 157–162.
- (38) G. V. Kunte, U. Ail, S. A. Shivashankar A. M. Umarji, *Bull. Mater. Sci.*, 2005, 28, 243–248.
